# Supplementary material for: Differentiation of the High Night Temperature Response in Leaf Segments of Rice Cultivars with Contrasting Tolerance
Source: MDPI journal article supplement (doi:10.3390/ijms221910451), 2021-09-28
Supplement: s1 [file s1]

Suppl. Fig. S1

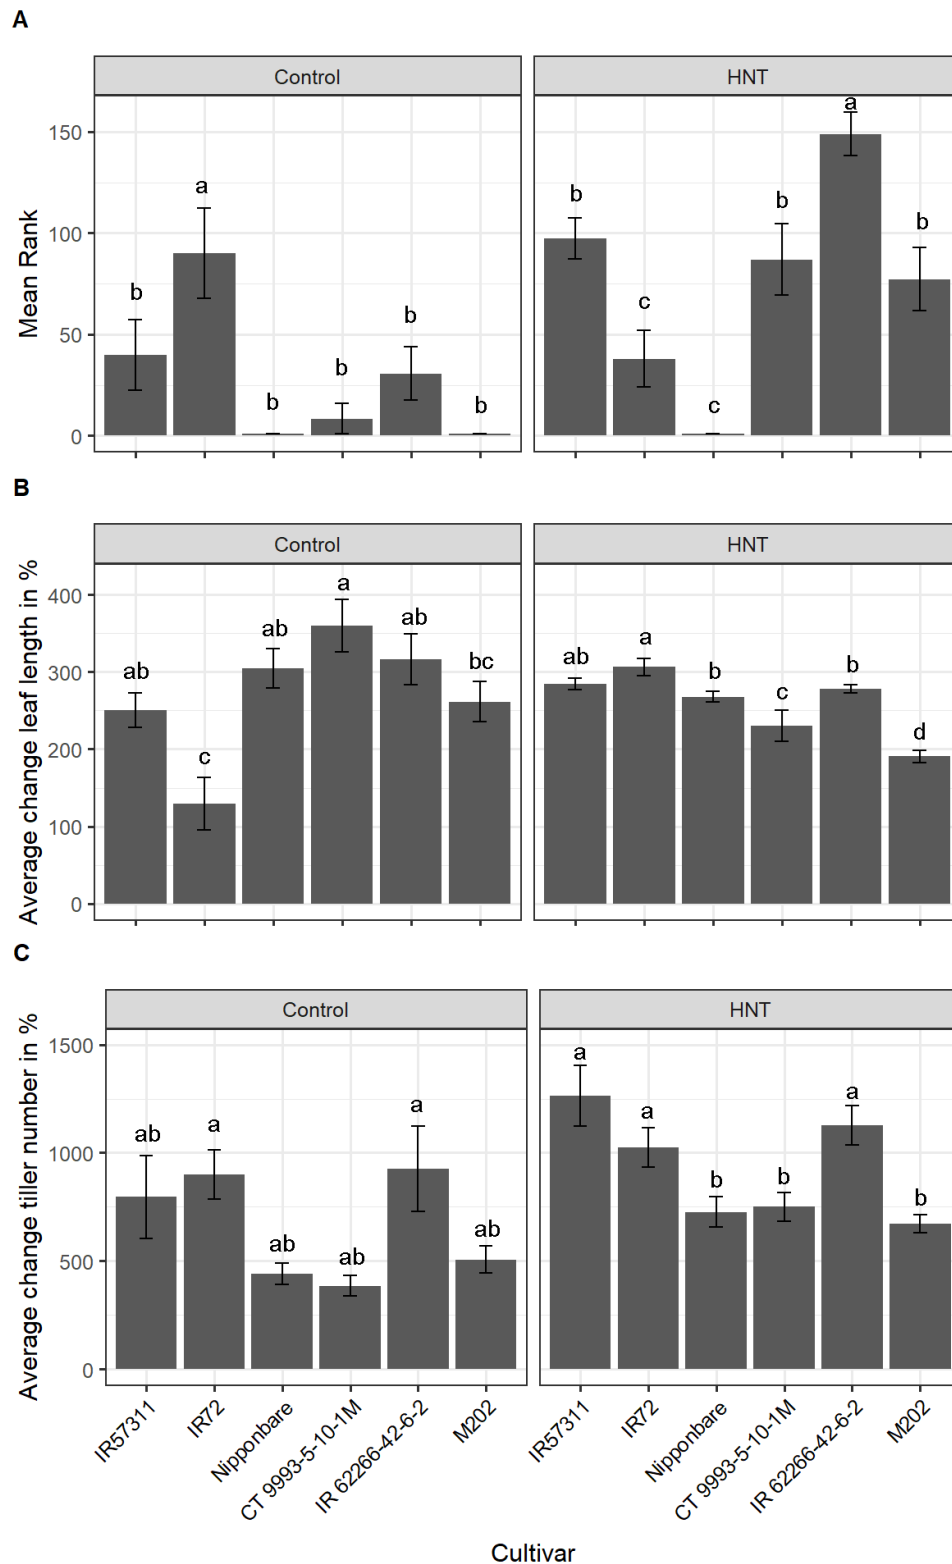

**Figure S1.** Mean rank of necrosis scores (A), average change of leaf length (B) and average change of tiller number (C) of six *Oryza sativa* cultivars at control and HNT conditions. Cultivars are sorted based on chlorosis ranking under HNT. For the necrosis rank larger values indicate high damage while smaller values represent a lower damage. Necrosis mean ranks are based on visual scoring in percentage.

Suppl. Fig. S2

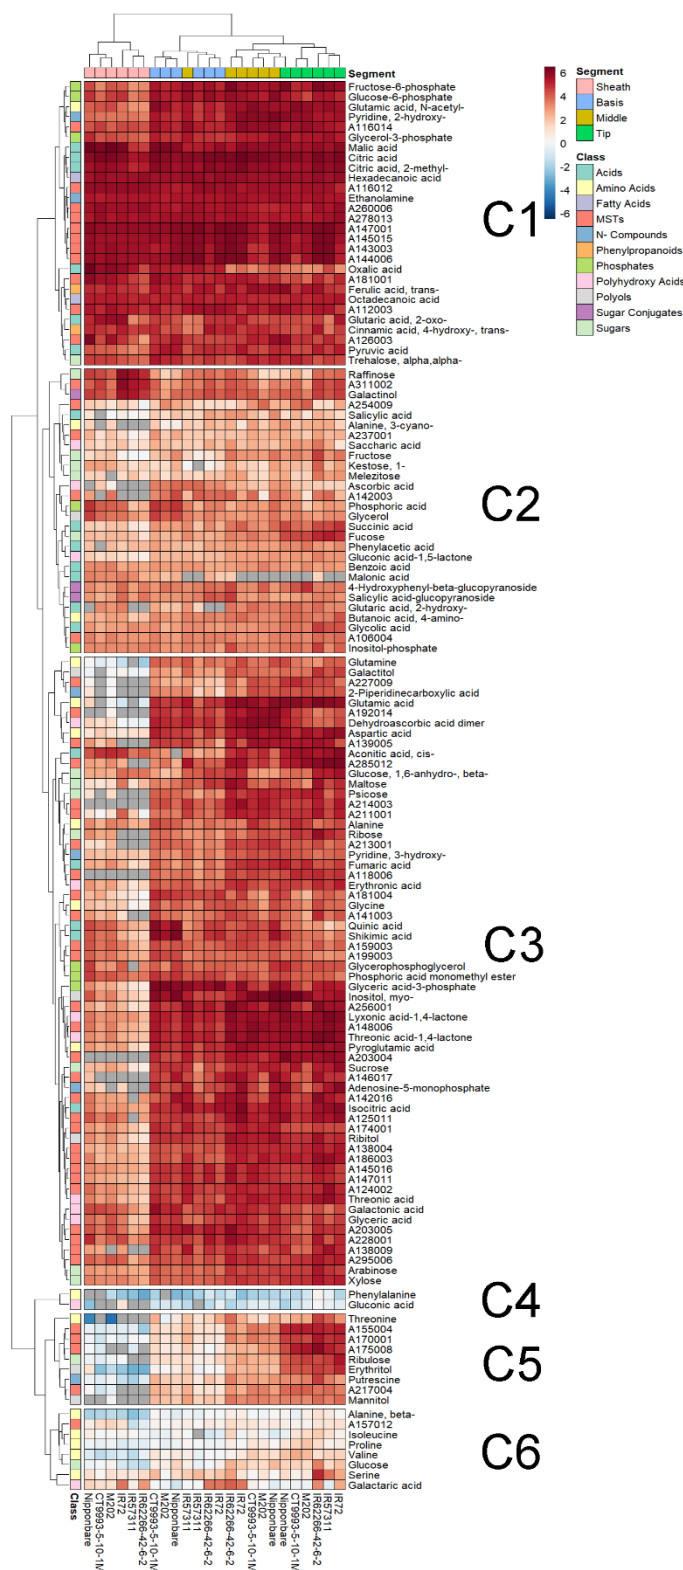

**Figure S2.** Metabolites in leaf sheath and three leaf blade segments represented as  $\log_2$  transformed levels. Red color indicates a higher level, blue color a lower level. Tolerance and metabolite classes are color-coded.

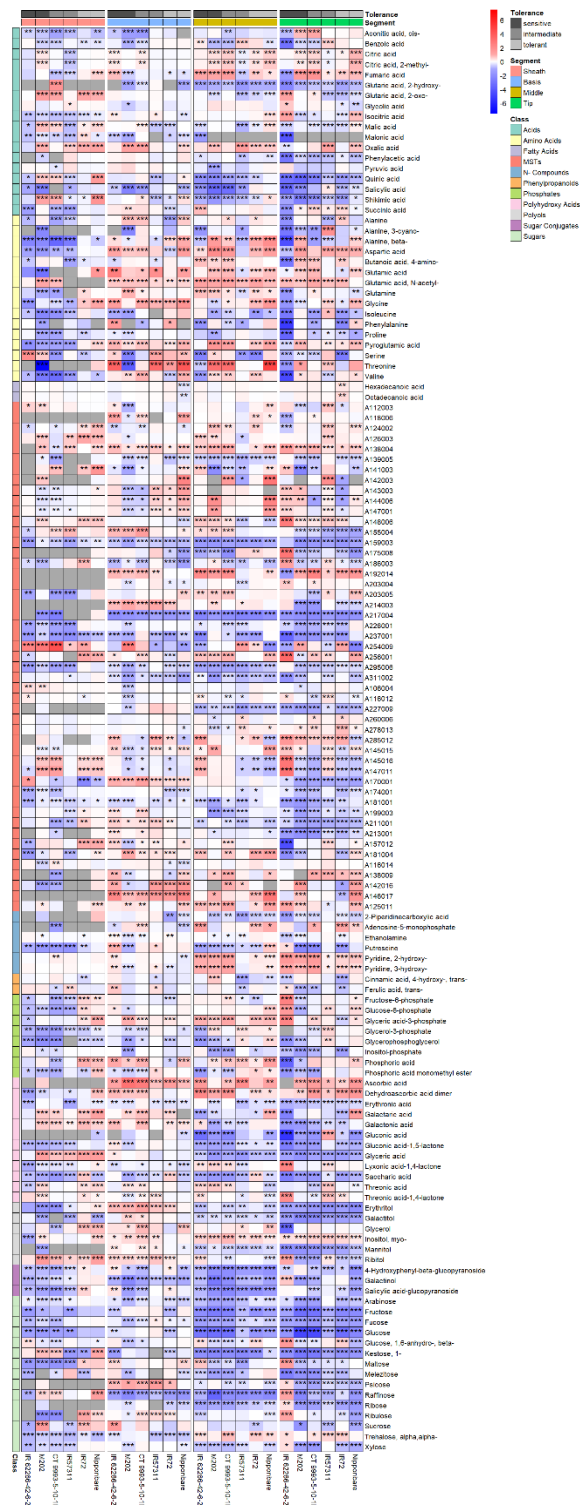

**Figure S3.** Changes of metabolite levels in leaf sheath and three leaf blade segments represented as log<sub>2</sub> fold changes. Red color indicates a higher log<sub>2</sub> fold change, blue color a lower log<sub>2</sub> fold change compared to control. Asterisks display significance level of p values: < 0.001 - \*\*\*, >= 0.001 and <= 0.01 - \*\*, >= 0.01 and <= 0.05 - \*. Tolerance and metabolite classes are color coded.
