# Supplementary material for: Differentiation of the High Night Temperature Response in Leaf Segments of Rice Cultivars with Contrasting Tolerance
Source: Int J Mol Sci. 2021 Sep 28;22(19):10451. doi: 10.3390/ijms221910451 (PMC8508630; doi:10.3390/ijms221910451)
Supplement: Supplementary file 1 [file ijms-22-10451-s001.zip]

Archive with 8 entries (8 files):
- Schaarschmidt and Glaubitz 2021 Suppl_Fig.pdf
- Table S1.xlsx
- Table S2.xlsx
- Table S3.xlsx
- Table S4.xlsx
- Table S5.xlsx
- Table S6.xlsx
- Table S7.xlsx
