# Supplementary material for: Differentiation of the High Night Temperature Response in Leaf Segments of Rice Cultivars with Contrasting Tolerance
Source: Int J Mol Sci. 2021 Sep 28;22(19):10451. doi: 10.3390/ijms221910451 (PMC8508630; doi:10.3390/ijms221910451)
Supplement: Supplementary file 1 [file ijms-22-10451-s001.zip › Table S1.xlsx]

## Sheet: mapping_statistics
Suppl. Table 1: Mapping statistics for six Oryza sativa cultivars with different sensitivities to high night temperature stress.
Sample	Cultivar	Subspecies	Segment	Tolerance	Condition	Total	Secondary	Mapped	Unmapped	% mapped
A	CT9993-5-10-1M	japonica	Tip	sensitive	Control	30069269	1445122	29735561	333708	98.8902
B	IR62266-42-6-2-42-6-2	indica	Tip	sensitive	Control	25310493	1437856	24757660	552833	97.8158
C	IR57311	indica	Tip	tolerant	Control	24764364	1409421	24190882	573482	97.6842
D	IR72	indica	Tip	tolerant	Control	29521044	1435399	29009402	511642	98.2669
E	M202	japonica	Tip	sensitive	Control	25570442	1205206	25086358	484084	98.1069
F	Nipponbare	japonica	Tip	tolerant	Control	27581807	1262972	27462123	119684	99.5661
G	CT9993-5-10-1M	japonica	Middle	sensitive	Control	25638840	1230691	25365304	273536	98.9331
H	IR62266-42-6-2	indica	Middle	sensitive	Control	23901199	1117908	23493425	407774	98.2939
I	IR57311	indica	Middle	tolerant	Control	25628432	1270405	25192532	435900	98.2992
J	cultivar	indica	Middle	tolerant	Control	23537658	1103299	23185261	352397	98.5028
K	IR72	japonica	Middle	sensitive	Control	23666222	1236478	23399620	266602	98.8735
L	M202	japonica	Middle	tolerant	Control	28183781	1360005	28053641	130140	99.5382
M	Nipponbare	japonica	Basis	sensitive	Control	29657927	1308472	29354777	303150	98.9778
N	CT9993-5-10-1M	indica	Basis	sensitive	Control	22747286	1077235	22408603	338683	98.5111
O	IR62266-42-6-2	indica	Basis	tolerant	Control	24519984	1159925	24053334	466650	98.0969
P	IR57311	indica	Basis	tolerant	Control	24400544	1069166	24020021	380523	98.4405
Q	IR72	japonica	Basis	sensitive	Control	29061450	1345611	28747594	313856	98.92
R	M202	japonica	Basis	tolerant	Control	30927118	1549296	30705021	222097	99.2819
S	Nipponbare	japonica	Sheath	sensitive	Control	31941914	1440469	31329191	612723	98.0818
T	CT9993-5-10-1M	indica	Sheath	sensitive	Control	30364172	1356598	29871412	492760	98.3772
U	IR62266-42-6-2	indica	Sheath	tolerant	Control	29505881	1280766	29001696	504185	98.2912
V	IR57311	indica	Sheath	tolerant	Control	24786086	1102269	24356787	429299	98.268
W	IR72	japonica	Sheath	sensitive	Control	32541305	1302236	32177964	363341	98.8834
X	M202	japonica	Sheath	tolerant	Control	33415218	1476336	33232115	183103	99.452
Y	Nipponbare	japonica	Tip	sensitive	HNT	24492230	1324113	24213703	278527	98.8628
Z	CT9993-5-10-1M	indica	Tip	sensitive	HNT	27518568	1370250	27061336	457232	98.3385
AA	IR62266-42-6-2	indica	Tip	tolerant	HNT	24576287	1177220	24153434	422853	98.2794
AB	IR72	indica	Tip	tolerant	HNT	26720891	1302475	26288304	432587	98.3811
AC	M202	japonica	Tip	sensitive	HNT	25725599	1502216	25422719	302880	98.8227
AD	Nipponbare	japonica	Tip	tolerant	HNT	26921674	1599442	26708879	212795	99.2096
AE	CT9993-5-10-1M	japonica	Middle	sensitive	HNT	26015898	1102060	25708053	307845	98.8167
AF	IR62266-42-6-2	indica	Middle	sensitive	HNT	26305850	1181552	25852053	453797	98.2749
AG	IR57311	indica	Middle	tolerant	HNT	28185954	1318608	27722474	463480	98.3556
AH	IR72	indica	Middle	tolerant	HNT	24897552	1089538	24495496	402056	98.3852
AI	M202	japonica	Middle	sensitive	HNT	23913108	1033027	23633389	279719	98.8303
AJ	Nipponbare	japonica	Middle	tolerant	HNT	36781009	1924577	36564317	216692	99.4109
AK	CT9993-5-10-1M	japonica	Basis	sensitive	HNT	42351535	1726308	41896697	454838	98.926
AL	IR62266-42-6-2	indica	Basis	sensitive	HNT	49046226	2031702	48309980	736246	98.4989
AM	IR57311	indica	Basis	tolerant	HNT	38637193	1679164	38040798	596395	98.4564
AN	IR72	indica	Basis	tolerant	HNT	32154642	1336152	31643877	510765	98.4115
AO	M202	japonica	Basis	sensitive	HNT	36459990	1837305	36032046	427944	98.8263
AP	Nipponbare	japonica	Basis	tolerant	HNT	41262449	1909278	41029423	233026	99.4353
AQ	CT9993-5-10-1M	japonica	Sheath	sensitive	HNT	38535921	1748330	38035965	499956	98.7026
AR	IR62266-42-6-2	indica	Sheath	sensitive	HNT	35006927	1681925	34391677	615250	98.2425
AS	IR57311	indica	Sheath	tolerant	HNT	39222650	1810415	38588644	634006	98.3836
AT	IR72	indica	Sheath	tolerant	HNT	39949605	1936933	39243770	705835	98.2332
AU	M202	japonica	Sheath	sensitive	HNT	27456109	1261757	25773818	1682291	93.8728
AV	Nipponbare	japonica	Sheath	tolerant	HNT	22846504	1024346	22243788	602716	97.3619
