# Supplementary material for: Differentiation of the High Night Temperature Response in Leaf Segments of Rice Cultivars with Contrasting Tolerance
Source: Int J Mol Sci. 2021 Sep 28;22(19):10451. doi: 10.3390/ijms221910451 (PMC8508630; doi:10.3390/ijms221910451)
Supplement: Supplementary file 1 [file ijms-22-10451-s001.zip › Table S2.xlsx]

## Sheet: Sheath
Suppl. Table S2: Significantly differentially expressed genes for HNT-sensitive rice cultivars using edgeR and DESeq2 analysing leaf sheath segments.
GENE_ID	GENE_DESCRIPTION	GENE_NAME	log2FC.edgeR	FDR.edgeR	log2FC.DESeq2	FDR.DESeq2
Os07g0142100	Conserved hypothetical protein		-5.64348	4.44108e-11	-5.64136	4.74539e-08
Os07g0142200	Conserved hypothetical protein	gp1	-5.01011	2.04976e-10	-5.01042	1.14538e-09
Os02g0770800	Similar to Nitrate reductase [NAD(P)H] (EC 1.7.1.2)	OsNIA1	-3.61695	0.000105244	-3.6069	7.45847e-06
Os06g0699100	Transferase domain containing protein	OsAT20	-3.28342	0.0267794	-3.28107	0.0497365
Os01g0647200	Hypothetical conserved gene		-3.07509	2.0705e-05	-3.0701	0.0979228
Os02g0226200	HAD-superfamily subfamily IB hydrolase, hypothetical 1 protein		-2.87428	2.00428e-09	-2.86254	1.08323e-06
Os08g0508700	Similar to EIL3	OsEIL4	-2.84648	0.00245363	-2.83313	0.00314849
Os06g0210000	Protein of unknown function DUF6 domain containing protein		-2.54682	2.00428e-09	-2.53735	1.82673e-08
Os11g0153500	Protein of unknown function DUF3049 domain containing protein		-2.23131	0.0300407	-2.22373	0.00306676
Os05g0374200	Similar to Cytokinin dehydrogenase 2	OsCKX9	-2.07703	8.37456e-05	-2.06801	0.0047562
Os11g0104300	Substrate of the SCF<sup>D3</sup> ubiquitination complex, Repressor of strigolactone (SL) signallin	D53	-1.94698	6.1399e-06	-1.93754	0.000144265
Os12g0104300	Clp, N-terminal domain containing protein	D53-like	-1.93599	1.90225e-05	-1.92787	0.0205909
Os10g0544600	Zinc finger, RING/FYVE/PHD-type domain containing protein		2.20699	0.0361149	2.21612	0.0357565
Os02g0736400	Aldolase-type TIM barrel domain containing protein	OsDHODH1	2.23375	4.69571e-06	2.24106	0.0497365
Os06g0242700	SAM dependent carboxyl methyltransferase family protein		2.72317	0.000881626	2.73045	0.0845908
Os03g0255100	Similar to Relative to SR12 protein (Fragment)	OsBgal8	2.73693	1.08366e-06	2.73982	0.0233477
Os09g0492700	Similar to 3-hydroxy-3-methylglutaryl coenzyme A reductase (EC 1.1.1.34) (Fragment)	HMGR	2.83597	2.93162e-05	2.8424	0.063715
Os05g0209600	Similar to Esterase	OsGELP63	3.03658	4.88984e-05	3.04342	0.0318979
Os07g0245100	Similar to Cytosine deaminase (EC 3.5.4.1)		3.11485	1.08366e-06	3.12253	0.0233477
Os02g0120100	Serine/threonine/tyrosine protein kinase, STY kinase, Regulation of ammonium uptak	OsACTPK1	3.31709	0.0123552	3.3324	0.00116017
Os01g0946700	Similar to Glucan endo-1,3-beta-glucosidase GV (EC 3.2.1.39) ((1->3)-beta-glucan endohydrolase GV) ((1->3)-beta-glucanase isoenzyme GV) (Beta-1,3- endoglucanase GV)	OsGLN1	3.39722	0.0186425	3.41374	0.00309111
Os11g0113700	Serine/threonine protein kinase, Abiotic stresse	CIPK15	3.51636	1.60955e-05	3.52711	0.0389473
Os12g0437800	Similar to MPI	Sci1	3.82708	0.000289542	3.8302	0.0587544
Os04g0108600	Similar to Sesquiterpene synthase (Fragment)		4.0973	4.88984e-05	4.11021	0.0359745
Os12g0113600	Hypothetical protein		4.15292	0.0131074	4.17235	0.0627842
Os02g0783700	Similar to Lysine ketoglutarate reductase/saccharopine dehydrogenase		4.41235	3.71956e-10	4.4207	4.74539e-08
Os08g0544400	ABC-2 type transporter domain containing protein	OsABCG45	4.7041	1.65614e-09	4.70822	6.71258e-06
Os08g0189200	Germin-like protein 8-3, Disease resistanc	GLP8-3	4.76887	0.000105244	4.77607	0.0318979
Os10g0360100	Similar to Sugar transporter protein		4.7937	0.00739474	4.85892	0.0497365
Os11g0147150	Hypothetical gene		5.53813	0.000758754	5.55298	0.0233477
Os08g0287200	Hypothetical conserved gene		6.33071	0.00107147	6.50933	0.0522547
Os06g0242000	Similar to benzoate carboxyl methyltransferase		9.26696	0.00232383	9.32298	0.0845908

## Sheet: Base
Suppl. Table S2: Significantly differentially expressed genes for HNT-sensitive rice cultivars using edgeR and DESeq2 analysing leaf base segments.
GENE_ID	GENE_DESCRIPTION	GENE_NAME	log2FC.edgeR	FDR.edgeR	log2FC.DESeq2	FDR.DESeq2
Os11g0154900	Similar to DNA-binding factor of bZIP class (Fragment)	OsbZIP80	-3.53735	0.0288001	-3.5842	0.0156353
Os02g0770800	Similar to Nitrate reductase [NAD(P)H] (EC 1.7.1.2)	OsNIA1	-3.4419	4.90449e-06	-3.45264	0.013804

## Sheet: Middle
Suppl. Table S2: Significantly differentially expressed genes for HNT-sensitive rice cultivars using edgeR and DESeq2 analysing leaf middle segments.
GENE_ID	GENE_DESCRIPTION	GENE_NAME	log2FC.edgeR	FDR.edgeR	log2FC.DESeq2	FDR.DESeq2
Os12g0282000	Conserved hypothetical protein	OsMIR	-5.7077	0.00909044	-5.76628	0.0794442
Os07g0142100	Conserved hypothetical protein		-4.7306	1.43784e-05	-4.74136	0.00867732
Os07g0142200	Conserved hypothetical protein	gp1	-4.36772	9.40037e-05	-4.37943	0.0321781
Os07g0258400	OsNramp1 (Integral membrane protein)	NRAMP1	-4.0603	8.88187e-05	-4.07004	0.0427505
Os08g0455900	Putative copper transporter 5.2	COPT6	-3.93697	0.010179	-3.99244	0.0610659
Os08g0508700	Similar to EIL3	OsEIL4	-3.76034	0.00729298	-3.78193	0.0553096
Os06g0699100	Transferase domain containing protein	OsAT20	-3.75024	9.29202e-09	-3.76402	3.19089e-05
Os11g0154900	Similar to DNA-binding factor of bZIP class (Fragment)	OsbZIP80	-3.67537	0.0112759	-3.71256	0.0321412
Os06g0210000	Protein of unknown function DUF6 domain containing protein		-3.39171	0.00236192	-3.41096	0.00922726
Os08g0200600	NAC transcription factor, Negative regulation of drought toleranc	OMTN6	-3.16129	6.58653e-08	-3.17232	0.00112983
Os01g0647200	Hypothetical conserved gene		-2.99341	6.78285e-06	-3.00377	0.0725497
Os02g0770800	Similar to Nitrate reductase [NAD(P)H] (EC 1.7.1.2)	OsNIA1	-2.90279	7.49989e-06	-2.913	0.0236037
Os03g0261100	Phospholipase A2 family protein	PLA2-II	-2.81396	4.23684e-05	-2.82355	0.0390275
Os03g0725200	Hypothetical protein		-2.63646	0.000143862	-2.64786	0.0421443
Os12g0194900	Similar to Amino acid carrier (Fragment)	OsAAP10B	-2.50085	3.38099e-09	-2.51093	1.97551e-07
Os08g0547300	Similar to Cytochrome P450 78A1 (EC 1.14.-.-) (CYPLXXVIII)		-2.45477	1.50172e-06	-2.4654	0.0142553
Os08g0536350	NA	NA	-2.41905	0.000486168	-2.43294	0.00112983
Os05g0592300	Protein of unknown function DUF1637 family protein		-2.40703	8.93172e-06	-2.41756	0.0725497
Os05g0475700	Nodulin-like domain containing protein	OsMFS3	-2.09874	0.00138503	-2.10952	0.000205715
Os09g0548400	Dimethylaniline monooxygenase, N-oxide-forming domain containing protein		-1.98666	4.80166e-06	-1.99655	0.00384734
Os06g0476200	Similar to Phosphoglucomutase precursor (EC 5.4.2.2)		-1.9466	2.29715e-05	-1.95498	0.0755231
Os11g0104300	Substrate of the SCF<sup>D3</sup> ubiquitination complex, Repressor of strigolactone (SL) signallin	D53	-1.83299	2.84411e-05	-1.84298	0.0321781
Os07g0575500	Similar to beta-hexosaminidase		-1.80379	0.00258419	-1.81657	0.0651337
Os03g0843800	Methyl chloride transferase	OsHOL1	-1.70458	4.55285e-05	-1.71513	0.0760099
Os10g0450900	Similar to Glycine-rich cell wall structural protein 2 precursor	GRP	2.3535	8.00529e-07	2.34317	0.0225726
Os04g0689500	Similar to H0814G11.12 protein		2.80117	0.0109174	2.79616	0.00010269
Os06g0316800	Similar to Glycine-rich protein (Fragment)		2.81248	4.75925e-07	2.80246	0.00267731
Os08g0321000	FAS1 domain domain containing protein	OsFLA3	2.91852	0.00505194	2.91354	0.00197688
Os12g0115050	NA	NA	2.92547	1.56442e-07	2.91791	0.00204008
Os05g0563600	FAS1 domain domain containing protein	OsFLA6	2.9507	0.00543314	2.94097	0.059079
Os03g0246500	Protein of unknown function DUF869, plant family protein		3.00103	0.00436331	2.99556	0.0135884
Os05g0427400	Similar to Phenylalanine ammonia-lyase	OsPAL04	3.08625	0.0109174	3.08668	0.0173146
Os03g0103200	Similar to Physical impedance induced protein	OsHyPRP04	3.1318	8.18358e-06	3.1205	0.0421443
Os03g0300400	Pathogen-related protein (JIOsPR10)	JIOsPR10	3.16416	0.00461269	3.1575	0.0930327
Os04g0650700	Similar to OSIGBa0113E10.3 protein	OsASNase2	3.19397	2.45277e-05	3.18293	0.0698125
Os08g0441500	Cinnamoyl-CoA reductase, Lignin formatio	OsCCR	3.24769	0.00139301	3.24409	0.000161873
Os11g0592100	Similar to Barwin	OsPR4b	3.29643	0.0103223	3.29916	0.018945
Os09g0456800	Similar to Heat stress transcription factor Spl7 (Heat shock transcription factor) (Heat shock factor RHSF10)	HSFB1	3.36796	0.00416652	3.36556	0.0173164
Os05g0444200	Similar to T6J4.5 protein (WIP6 protein)		3.42839	0.000378573	3.42299	0.000717731
Os04g0581000	Similar to Flavanone 3-hydroxylase (Fragment)		3.54562	0.0132063	3.54899	0.0189451
Os05g0134400	Haem peroxidase, plant/fungal/bacterial family protein	prx65	3.58292	0.00538226	3.57711	0.0321781
Os03g0130300	Similar to Cp-thionin	DEFL8	3.60441	0.00909044	3.60549	0.0658656
Os07g0590700	Similar to transcriptional regulatory protein algP	OsAGP13	3.64206	0.0108626	3.65967	0.059079
Os11g0213000	Similar to Protein kinase domain containing protein, expressed	OsWD40-188	3.76686	0.0102392	3.76606	0.0427505
Os06g0701700	Ion transporter , Na+/K+ sympor	HKT1	3.79872	0.0129109	3.82216	0.0988206
Os02g0232900	A member of the Nodulin26-like Intrinsic Protein (NIP) family, Arsenite transporte	OsNIP1	3.88029	0.00139301	3.88896	0.000186765
Os02g0627100	Similar to Phenylalanine ammonia-lyase (EC 4.3.1.5)	OsPAL1	3.91411	0.000429361	3.90765	0.00551454
Os09g0272600	Conserved hypothetical protein		3.96936	1.94167e-05	3.9585	0.00931402
Os01g0124100	Proteinase inhibitor I12, Bowman-Birk family protein	RBBI3-2	4.05429	0.00848504	4.06519	0.0823971
Os05g0550300	Similar to Lipid transfer protein (Fragment)	OsLTP2.4	4.14345	0.0037478	4.14072	0.0321412
Os06g0317200	Similar to glycine-rich cell wall structural protein		4.14422	0.0046025	4.1478	0.0321781
Os10g0392400	Tify domain containing protein	OsTIFY11d	4.15731	0.0035753	4.15247	0.0722071
Os07g0480800	Cellulase (EC 3.2.1.4)	OsXTH21	4.18077	0.000959295	4.19633	0.000556336
Os06g0567900	L-ascorbate oxidase, Cold, salt, drought stress respons	AO	4.56818	0.000383981	4.5634	0.0270826
Os05g0580000	Similar to ADP-glucose pyrophosphorylase (EC 2.7.7.27) (Fragment)	OsAGPL3	4.64919	4.75925e-07	4.64354	0.000600316
Os02g0106100	Similar to Fructosyltransferase	OSINV3	4.69797	7.72669e-05	4.69469	0.00112983
Os01g0378100	Plant peroxidase domain containing protein		4.6908	0.00170458	4.72518	0.0106173
Os02g0719600	SAM dependent carboxyl methyltransferase family protein	JMT-2	4.78991	0.00416498	4.78843	0.0572422
Os03g0277600	Similar to (clone wusl1032) mRNA sequence	OsDUF26	4.71608	0.00843983	4.79967	0.0936302
Os01g0823100	Alpha-expansin OsEXPA2	OsEXP2	4.84345	1.54129e-05	4.84683	3.47174e-09
Os12g0472800	B repeat unit of collagen binding surface protein (cna) containing protein	OsPOEI19	4.89894	0.000138735	4.9627	3.13292e-05
Os06g0156600	Lipase, GDSL domain containing protein	OsGELP77	4.982	0.000207808	5.01344	2.13216e-05
Os01g0611000	Protein of unknown function DUF642 domain containing protein		4.99106	0.000509415	5.01934	0.000600316
Os05g0477600	Alpha-expansin OsEXPA4	OsEXP4	5.16292	1.57398e-05	5.17133	3.65062e-08
Os04g0344100	Similar to OSIGBa0106G08.3 protein		5.20739	2.0612e-05	5.20331	0.0117768
Os07g0526400	Polyketide synthase, type III domain containing protein	OsPKS15	5.34318	0.00753469	5.37006	0.0725497
Os10g0555600	Beta-expansin precursor	OsEXPB6	5.60824	2.95443e-05	5.62447	1.46399e-05
Os10g0555900	Similar to Beta-expansin	OsEXPB3	5.95812	1.92623e-15	5.95339	1.35971e-13
Os02g0658800	Beta-expansin	OsEXPB11	6.19161	0.000160977	6.40537	0.0135884
Os04g0418800	Similar to Hydroxyproline-rich glycoprotein		6.26341	0.000247787	6.40613	0.00726929
Os02g0236600	Peroxidase P7 (EC 1.11.1.7) (TP7)	prx27	7.24387	0.00436363	6.50922	0.0526838
Os10g0556100	Similar to beta-expansin EXPB4	OsEXPB4	6.64355	1.84149e-05	6.74877	2.13216e-05
Os04g0350100	Proteinase inhibitor I25, cystatin domain containing protein		6.90463	8.77566e-05	7.20284	0.0079191
Os04g0659300	Receptor-like protein, Root development, Salt stress response, Regulation of iron acquisitio	OsRMC	7.58475	0.000113057	7.6528	0.00363002
Os08g0189200	Germin-like protein 8-3, Disease resistanc	GLP8-3	9.12488	0.000896227	8.39968	0.0321781
Os04g0108600	Similar to Sesquiterpene synthase (Fragment)		8.15916	1.43784e-05	8.45265	0.000224304
Os02g0112900	Similar to Viroid RNA-binding protein (Fragment)	OsGABA-T	9.21685	0.000401906	8.49099	0.0142553
Os10g0118200	Conserved hypothetical protein	ZRP4	9.84702	2.45849e-05	9.12242	0.000265385

## Sheet: Tip
Suppl. Table S2: Significantly differentially expressed genes for HNT-sensitive rice cultivars using edgeR and DESeq2 analysing leaf tip segments.
GENE_ID	GENE_DESCRIPTION	GENE_NAME	log2FC.edgeR	FDR.edgeR	log2FC.DESeq2	FDR.DESeq2
Os07g0142200	Conserved hypothetical protein	gp1	-6.86008	9.24487e-09	-6.87468	2.32219e-05
Os07g0142100	Conserved hypothetical protein		-5.89588	1.72771e-06	-5.90198	0.000161411
Os08g0508700	Similar to EIL3	OsEIL4	-4.98882	0.000681082	-5.0398	2.84147e-06
Os07g0258400	OsNramp1 (Integral membrane protein)	NRAMP1	-4.75878	3.30439e-06	-4.76708	0.00174993
Os01g0952800	Achaete-scute transcription factor related domain containing protein	OsIRO2	-4.68876	4.15997e-05	-4.69568	0.0111741
Os10g0204400	Similar to Phosphoenolpyruvate carboxykinase (Fragment)	PEPCK	-4.60493	0.0107302	-4.61605	0.0987582
Os02g0594166	Conserved hypothetical protein		-4.31009	0.000681082	-4.31886	0.0987582
Os01g0647200	Hypothetical conserved gene		-3.80201	6.48632e-05	-3.80796	0.07037
Os03g0281300	phosphotransferase system, PEP-utilising enzyme, N-terminal domain containing protein		-3.68217	0.0417195	-3.77109	0.0793457
Os08g0547300	Similar to Cytochrome P450 78A1 (EC 1.14.-.-) (CYPLXXVIII)		-3.41271	1.02316e-07	-3.42025	0.000336743
Os12g0194900	Similar to Amino acid carrier (Fragment)	OsAAP10B	-3.10131	3.30439e-06	-3.10933	0.000184167
Os05g0475700	Nodulin-like domain containing protein	OsMFS3	-2.65818	0.00536108	-2.66904	0.0332319
Os02g0175000	Ion transporter , Na+ transpor	HKT6	-2.60716	0.000307934	-2.61696	0.0601367
Os04g0453200	Similar to Monosaccharide transporter 1		-2.51473	0.01768	-2.53005	0.0111741
Os11g0104300	Substrate of the SCF<sup>D3</sup> ubiquitination complex, Repressor of strigolactone (SL) signallin	D53	-1.7322	0.000307934	-1.7386	0.0323468
Os05g0580000	Similar to ADP-glucose pyrophosphorylase (EC 2.7.7.27) (Fragment)	OsAGPL3	3.8214	9.24487e-09	3.81081	8.01967e-05
Os01g0823100	Alpha-expansin OsEXPA2	OsEXP2	4.24659	0.0166274	4.27376	0.00696
Os10g0555900	Similar to Beta-expansin	OsEXPB3	4.37279	0.0022214	4.38004	0.000184167
Os04g0493600	Similar to Lectin-C precursor (PL-C)		5.48147	0.00258182	5.72339	0.0298374
Os02g0719600	SAM dependent carboxyl methyltransferase family protein	JMT-2	6.20395	0.000166156	6.27848	8.69809e-07
Os10g0118200	Conserved hypothetical protein	ZRP4	6.32788	0.000102134	6.4539	4.23242e-05
Os07g0526400	Polyketide synthase, type III domain containing protein	OsPKS15	6.61888	0.00738478	6.69656	0.0323468
Os04g0659300	Receptor-like protein, Root development, Salt stress response, Regulation of iron acquisitio	OsRMC	8.95616	2.72913e-05	8.97346	0.0111741
