# Supplementary material for: Differentiation of the High Night Temperature Response in Leaf Segments of Rice Cultivars with Contrasting Tolerance
Source: Int J Mol Sci. 2021 Sep 28;22(19):10451. doi: 10.3390/ijms221910451 (PMC8508630; doi:10.3390/ijms221910451)
Supplement: Supplementary file 1 [file ijms-22-10451-s001.zip › Table S5.xlsx]

## Sheet: Sheath
Suppl. Table S5: Uniquely differentially expressed genes in the leaf sheath segments for the HNT-tolerant group under HNT using DESeq2 and edgeR.
GENE_ID	GENE_DESCRIPTION	GENE_NAME	log2FC.edgeR	FDR.edgeR	log2FC.DESeq2	FDR.DESeq2
Os01g0382000	Similar to Pathogenesis-related protein PRB1-2 precursor	OsPR1b	-5.23203	0.00294617	-5.22559	0.05599
Os07g0142100	Conserved hypothetical protein		-3.91936	2.64365e-05	-3.90555	0.0817294
Os02g0770800	Similar to Nitrate reductase [NAD(P)H] (EC 1.7.1.2)	OsNIA1	-3.11449	0.00615977	-3.09853	0.0323764
Os03g0291500	Asparagine synthetase, Biosynthesis of asparagine following the supply of ammoniu	ASN1	5.27744	7.54116e-05	5.29387	0.0323764
Os01g0159000	Similar to cDNA clone:J023049H21, full insert sequence	OsDOG1L-2	8.62046	0.00452603	8.96101	0.0608871
Os01g0550800	Protein of unknown function DUF239, plant domain containing protein		8.6659	0.000169027	8.75388	0.0303467

## Sheet: Base
Suppl. Table S5: Uniquely differentially expressed genes in the leaf base segments for the HNT-tolerant group under HNT using DESeq2 and edgeR.
GENE_ID	GENE_DESCRIPTION	GENE_NAME	log2FC.edgeR	FDR.edgeR	log2FC.DESeq2	FDR.DESeq2

## Sheet: Middle
Suppl. Table S5: Uniquely differentially expressed genes in the leaf middle segments for the HNT-tolerant group under HNT using DESeq2 and edgeR.
GENE_ID	GENE_DESCRIPTION	GENE_NAME	log2FC.edgeR	FDR.edgeR	log2FC.DESeq2	FDR.DESeq2
Os01g0764800	Indole-3-acetic acid (IAA)-amido synthetase, Disease resistance, Abiotic stress toleranc	GH3-2	3.21672	0.0216654	3.21993	0.0284001
Os06g0316800	Similar to Glycine-rich protein (Fragment)		3.36667	2.266e-09	3.36505	1.8732e-05
Os05g0477600	Alpha-expansin OsEXPA4	OsEXP4	4.12773	0.00724506	4.14518	0.0273301
Os09g0272600	Conserved hypothetical protein		4.17149	4.05675e-05	4.17586	0.0219632
Os01g0823100	Alpha-expansin OsEXPA2	OsEXP2	4.58708	0.000342537	4.59172	1.8732e-05
Os10g0555900	Similar to Beta-expansin	OsEXPB3	5.22191	4.53332e-11	5.24221	2.07221e-07
Os10g0555600	Beta-expansin precursor	OsEXPB6	5.40971	0.00368327	5.55865	0.0843855

## Sheet: Tip
Suppl. Table S5: Uniquely differentially expressed genes in the leaf tip segments for the HNT-tolerant group under HNT using DESeq2 and edgeR.
GENE_ID	GENE_DESCRIPTION	GENE_NAME	log2FC.edgeR	FDR.edgeR	log2FC.DESeq2	FDR.DESeq2
Os05g0580000	Similar to ADP-glucose pyrophosphorylase (EC 2.7.7.27) (Fragment)	OsAGPL3	3.37939	3.31647e-06	3.3762	0.0316339
