# Supplementary material for: Differentiation of the High Night Temperature Response in Leaf Segments of Rice Cultivars with Contrasting Tolerance
Source: Int J Mol Sci. 2021 Sep 28;22(19):10451. doi: 10.3390/ijms221910451 (PMC8508630; doi:10.3390/ijms221910451)
Supplement: Supplementary file 1 [file ijms-22-10451-s001.zip › Table S6.xlsx]

## Sheet: overlap_sensitive
Suppl. Table S6: Overlapping significantly differentially expressed genes of the HNT-sensitive rice cultivars using a whole leaf microarray analysis (Glaubitz et al., 2017) and our RNA-seq study using edgeR and DESeq2.
ID	GENE_NAME	GENE_DESCRIPTION	CT9993.5.10.1M	M202	IR62266.42.6.2	LOG2FC_EDGR_STAR	FDR_EDGER_STAR	LOG2FC_DESEQ_STAR	FDR_DESEQ_STAR
Os02g0106100	OSINV3	rapdb|Similar to Fructosyltransferase. [Os02t0106100-01]	3.98591	4.97296	3.66974	4.69797	7.72669e-05	4.69469	0.00112983
Os05g0550300	OsLTP2.4	rapdb|Similar to Lipid transfer protein (Fragment). [Os05t0550300-01]	4.30599	4.64165	4.39865	4.14345	0.0037478	4.14072	0.0321412
Os05g0444200		rapdb|Similar to T6J4.5 protein (WIP6 protein). [Os05t0444200-01]	4.59938	5.80441	5.50127	3.42839	0.000378573	3.42299	0.000717731
Os10g0392400	OsTIFY11d	rapdb|Tify domain containing protein. [Os10t0392400-01]	5.02077	5.19607	6.08021	4.15731	0.0035753	4.15247	0.0722071
Os08g0189200	GLP8-3	rapdb|Similar to Oxalate oxidase (Fragment). [Os08t0189200-01]	NA	NA	3.56881	9.12488	0.000896227	8.39968	0.0321781
Os01g0611000		rapdb|Hypothetical conserved gene. [Os01t0611000-02]	NA	NA	3.56943	4.99106	0.000509415	5.01934	0.000600316
Os04g0689500		rapdb|Conserved hypothetical protein. [Os04t0689500-02]	NA	3.87132	3.58672	2.80117	0.0109174	2.79616	0.00010269
Os09g0456800	HSFB1	rapdb|Similar to Heat stress transcription factor Spl7 (Heat shock transcription factor) (Heat shock factor RHSF10). [Os09t0456800-01]	NA	4.88172	3.59774	3.36796	0.00416652	3.36556	0.0173164
Os04g0581000		rapdb|Similar to Flavanone 3-hydroxylase-like protein. [Os04t0581000-01]	NA	8.32343	3.82678	3.54562	0.0132063	3.54899	0.0189451
Os10g0555900	OsEXPB3	rapdb|Beta-expansin precursor. [Os10t0555900-02]	NA	6.70115	4.35975	5.95812	1.92623e-15	5.95339	1.35971e-13
Os01g0823100	OsEXP2	rapdb|Alpha-expansin OsEXPA2. [Os01t0823100-01]	NA	5.60628	4.36169	4.84345	1.54129e-05	4.84683	3.47174e-09
Os09g0272600		rapdb|Conserved hypothetical protein. [Os09t0272600-01]	NA	3.67249	4.47526	3.96936	1.94167e-05	3.9585	0.00931402
Os01g0124100	RBBI3-2	rapdb|Proteinase inhibitor I12, Bowman-Birk family protein. [Os01t0124100-01]	NA	3.72633	5.23504	4.05429	0.00848504	4.06519	0.0823971
Os04g0659300	OsRMC	rapdb|Protein of unknown function DUF26 domain containing protein. [Os04t0659300-01]	NA	6.34306	6.58381	7.58475	0.000113057	7.6528	0.00363002
Os05g0580000	OsAGPL3	rapdb|Similar to ADP-glucose pyrophosphorylase (EC 2.7.7.27) (Fragment). [Os05t0580000-01]	NA	4.29153	7.40572	4.64919	4.75925e-07	4.64354	0.000600316
Os08g0508700	OsEIL4	rapdb|Similar to EIL3. [Os08t0508700-01]	NA	-4.14074	NA	-3.76034	0.00729298	-3.78193	0.0553096
Os09g0548400		rapdb|Dimethylaniline monooxygenase, N-oxide-forming domain containing protein. [Os09t0548400-01]	NA	-3.73834	NA	-1.98666	4.80166e-06	-1.99655	0.00384734
Os10g0450900	GRP	rapdb|Similar to Glycine-rich cell wall structural protein 2 precursor. [Os10t0450900-03]	NA	3.45471	NA	2.3535	8.00529e-07	2.34317	0.0225726
Os06g0567900	AO	rapdb|Similar to Ascorbate oxidase (Fragment). [Os06t0567900-01]	NA	3.46124	NA	4.56818	0.000383981	4.5634	0.0270826
Os06g0316800		rapdb|Similar to Glycine-rich protein (Fragment). [Os06t0316800-01]	NA	3.52107	NA	2.81248	4.75925e-07	2.80246	0.00267731
Os06g0701700	NA	rapdb|Similar to Cation transporter HKT1. [Os06t0701700-01]	NA	3.63903	NA	3.79872	0.0129109	3.82216	0.0988206
Os05g0134400	prx65	rapdb|Haem peroxidase, plant/fungal/bacterial family protein. [Os05t0134400-01]	NA	3.78828	NA	3.58292	0.00538226	3.57711	0.0321781
Os03g0103200	OsHyPRP04	rapdb|Similar to Physical impedance induced protein. [Os03t0103200-01]	NA	3.86961	NA	3.1318	8.18358e-06	3.1205	0.0421443
Os08g0441500	OsCCR	rapdb|Similar to Cinnamoyl-CoA reductase. [Os08t0441500-01]	NA	3.88657	NA	3.24769	0.00139301	3.24409	0.000161873
Os02g0658800	OsEXPB11	rapdb|Beta-expansin. [Os02t0658800-01]	NA	3.93419	NA	6.19161	0.000160977	6.40537	0.0135884
Os02g0627100	OsPAL1	rapdb|Similar to Phenylalanine ammonia-lyase (EC 4.3.1.5). [Os02t0627100-01]	NA	3.97792	NA	3.91411	0.000429361	3.90765	0.00551454
Os02g0232900	OsNIP1	rapdb|Similar to NOD26-like membrane integral protein ZmNIP1-1. [Os02t0232900-01]	NA	4.03787	NA	3.88029	0.00139301	3.88896	0.000186765
Os11g0592100	OsPR4b	rapdb|Similar to Barwin. [Os11t0592100-01]	NA	4.1693	NA	3.29643	0.0103223	3.29916	0.018945
Os10g0556100	OsEXPB4	rapdb|Similar to beta-expansin EXPB4. [Os10t0556100-02]	NA	4.19873	NA	6.64355	1.84149e-05	6.74877	2.13216e-05
Os12g0472800	OsPOEI19	rapdb|B repeat unit of collagen binding surface protein (cna) containing protein. [Os12t0472800-01]	NA	4.20275	NA	4.89894	0.000138735	4.9627	3.13292e-05
Os05g0477600	OsEXP4	rapdb|Alpha-expansin OsEXPA4. [Os05t0477600-01]	NA	4.25009	NA	5.16292	1.57398e-05	5.17133	3.65062e-08
Os03g0277600	OsDUF26	rapdb|Similar to (clone wusl1032) mRNA sequence. [Os03t0277600-01]	NA	4.59956	NA	4.71608	0.00843983	4.79967	0.0936302
Os04g0650700	OsASNase2	rapdb|Similar to OSIGBa0113E10.3 protein. [Os04t0650700-04] || rapdb|Similar to L-asparaginase (L-asparagine amidohydrolase). [Os04t0650700-02]	NA	4.76467	NA	3.19397	2.45277e-05	3.18293	0.0698125
Os06g0317200		rapdb|Glycine-rich protein (Fragment). [Os06t0317200-03]	NA	5.97433	NA	4.14422	0.0046025	4.1478	0.0321781
Os02g0719600	JMT-2	rapdb|SAM dependent carboxyl methyltransferase family protein. [Os02t0719600-01]	NA	6.22012	NA	4.78991	0.00416498	4.78843	0.0572422
Os10g0555600	OsEXPB6	rapdb|Beta-expansin precursor. [Os10t0555600-01]	NA	6.44902	NA	5.60824	2.95443e-05	5.62447	1.46399e-05
Os08g0460000	OsGLP1	rapdb|Similar to Germin-like protein 1 precursor. [Os08t0460000-02]	NA	NA	3.63707	4.87577	0.0406476	NA	NA
Os05g0247100	DIP3	rapdb|Similar to Chitinase (EC 3.2.1.14) III C00481-rice (EC 3.2.1.14). [Os05t0247100-02] || rapdb|Glycoside hydrolase, family 18 protein. [Os05t0247100-01]	NA	NA	3.64023	1.86662	0.0288001	NA	NA
Os01g0850700	OsLAC8	rapdb|Similar to Laccase-7. [Os01t0850700-01] || rapdb|Cupredoxin domain containing protein. [Os01t0850700-02]	NA	NA	4.10759	2.08826	0.0323491	NA	NA
Os07g0529600	OsDR8	rapdb|Similar to Pathogen-induced defense-responsive protein 8. [Os07t0529600-02]	NA	-4.10079	NA	-3.8914	0.000232674	NA	NA
Os03g0233000		rapdb|Protein of unknown function DUF607 family protein. [Os03t0233000-01]	NA	4.91928	3.52222	3.80057	0.035631	NA	NA
Os03g0168300	NA	rapdb|Conserved hypothetical protein. [Os03t0168300-01]	NA	NA	3.52798	3.69022	0.0314406	NA	NA
Os01g0332100	OsNIN2	rapdb|Similar to Serine carboxypeptidase II-like protein. [Os01t0332500-01]	NA	NA	3.55222	-1.71077	0.00192413	NA	NA
Os04g0518400	OsPAL07	rapdb|Similar to Phenylalanine ammonia-lyase (Fragment). [Os04t0518400-01]	3.97824	7.16626	3.57759	3.68343	0.0228623	NA	NA
Os10g0468500		rapdb|Serine/threonine protein kinase-related domain containing protein. [Os10t0468500-01]	NA	4.84702	3.58606	2.52719	0.0486974	NA	NA
Os11g0134700	OsMC7	rapdb|Similar to Metacaspase 7 (Metacaspase 4). [Os11t0134700-01]	NA	NA	3.66432	3.62958	0.0240813	NA	NA
Os05g0578600	OsPGL21	rapdb|Similar to Polygalacturonase PG2. [Os05t0578600-01]	NA	NA	3.69578	4.77436	0.0306372	NA	NA
Os09g0439200	TIFY10C	rapdb|Tify domain containing protein. [Os09t0439200-01]	NA	NA	3.75547	2.95794	0.0300188	NA	NA
Os04g0526800		rapdb|GRAM domain containing protein. [Os04t0526800-01]	3.95539	4.84816	3.75797	3.76363	0.0290944	NA	NA
Os11g0289700		rapdb|Cytochrome P450 family protein. [Os11t0289700-01]	NA	5.03334	3.83666	3.21015	0.0160215	NA	NA
Os06g0106800		rapdb|Conserved hypothetical protein. [Os06t0106800-01]	3.91876	4.31658	3.84254	2.9324	0.0293928	NA	NA
Os03g0122300	FLS	rapdb|Similar to Flavanone 3-hydroxylase-like protein. [Os03t0122300-01] || rapdb|Similar to Oxidoreductase, 2OG-Fe oxygenase family protein, expressed. [Os03t0122300-02]	NA	3.91083	3.98644	3.54002	0.0174592	NA	NA
Os03g0251000		rapdb|Plant lipid transfer protein/seed storage/trypsin-alpha amylase inhibitor domain containing protein. [Os03t0251000-03]	NA	4.06939	4.00158	2.59752	0.0308834	NA	NA
Os12g0247700	OsJAC1	rapdb|Similar to Jasmonate-induced protein. [Os12t0247700-01]	5.43551	6.83505	4.03844	9.6749	0.0114523	NA	NA
Os11g0539200	OsXTH2	rapdb|Similar to Xyloglucan endotransglycosylase XET2 (Fragment). [Os11t0539200-01]	NA	NA	4.10525	6.09524	0.00671655	NA	NA
Os03g0221200		rapdb|Similar to Homocysteine S-methyltransferase 1 (EC 2.1.1.10) (S- methylmethionine:homocysteine methyltransferase 1) (SMM:Hcy S- methyltransferase 1) (ZmHMT-1). [Os03t0221200-01]	NA	4.43279	4.17421	2.98695	0.0473477	NA	NA
Os01g0132000	IAI2	rapdb|Similar to Wound-induced protease inhibitor (WIP1). [Os01t0132000-01]	NA	NA	4.27919	3.29401	0.00682686	NA	NA
Os11g0592200	OsPR4	rapdb|Similar to Chitin-binding allergen Bra r 2 (Fragments). [Os11t0592200-01]	NA	4.75108	4.37069	3.00436	0.0114523	NA	NA
Os08g0168000	NA	rapdb|Terpenoid synthase domain containing protein. [Os08t0168000-01]	NA	NA	4.75015	6.46021	0.037501	NA	NA
Os01g0124000	RBBI2-1	rapdb|Similar to Bowman Birk trypsin inhibitor. [Os01t0124000-01]	NA	3.5455	4.79897	3.76521	0.00958971	NA	NA
Os08g0544400	OsABCG45	rapdb|ABC-2 type transporter domain containing protein. [Os08t0544400-01]	NA	NA	4.82691	5.79521	0.022322	NA	NA
Os01g0294700	OsPOD	rapdb|Haem peroxidase, plant/fungal/bacterial family protein. [Os01t0294700-01]	NA	3.61716	4.91645	3.00464	0.0249737	NA	NA
Os01g0705700	OsICE1	rapdb|Similar to Transcription factor ICE1 (Inducer of CBF expression 1) (Basic helix- loop-helix protein 116) (bHLH116) (AtbHLH116). [Os01t0705700-01]	4.94715	5.67888	4.98184	3.57768	0.0331769	NA	NA
Os11g0211800	OsDT11	rapdb|Hypothetical protein. [Os11t0211800-01]	NA	4.35315	5.19283	8.59294	0.00881526	NA	NA
Os06g0244000		rapdb|SAM dependent carboxyl methyltransferase family protein. [Os06t0244000-01]	NA	NA	5.33115	3.38593	0.035631	NA	NA
Os03g0734300		rapdb|Similar to Proteinase inhibitor type II CEVI57 precursor. [Os03t0734300-01]	NA	5.58886	5.5585	3.17779	0.0252989	NA	NA
Os07g0154100	OSNCED3	rapdb|Similar to Viviparous-14. [Os07t0154100-01]	4.82569	NA	6.25365	5.14858	0.0417521	NA	NA
Os04g0511200	EFA27	tc|Rep: EFA27 for EF hand, abscisic acid, 27kD - Oryza sativa (Rice), complete [TC415780]	NA	3.78446	7.16879	4.35594	0.00963211	NA	NA
Os01g0348900	OsJRL	rapdb|SalT gene product (Salt-induced protein). [Os01t0348900-02]	NA	5.13656	7.33858	5.09328	0.00214017	NA	NA
Os02g0513100	OsSWEET15	rapdb|Similar to MtN3 protein precursor. [Os02t0513100-01]	NA	5.18667	9.18902	6.27431	0.022322	NA	NA
Os03g0749300	OsBGLU1	rapdb|Similar to Cell wall beta-glucosidase. [Os03t0749300-04]	NA	3.36545	NA	2.51037	0.000113057	NA	NA
Os02g0121700	OsTPS3	rapdb|Terpenoid synthase domain containing protein. [Os02t0121700-01]	NA	3.44424	NA	4.50166	0.0203972	NA	NA
Os01g0219300		rapdb|Conserved hypothetical protein. [Os01t0219300-01]	NA	3.49284	NA	2.93977	0.0484318	NA	NA
Os02g0626400	OsPAL	rapdb|Similar to Phenylalanine ammonia-lyase. [Os02t0626400-03]	NA	3.51561	NA	2.66092	0.000294057	NA	NA
Os04g0685400		rapdb|Harpin-induced 1 domain containing protein. [Os04t0685400-02]	NA	3.52151	NA	3.04981	0.037501	NA	NA
Os01g0764800	GH3-2	rapdb|Similar to Nt-gh3 deduced protein. [Os01t0764800-01]	NA	3.56595	NA	2.53285	0.0392463	NA	NA
Os04g0517100	OsMyb4	rapdb|Similar to OSIGBa0145M07.4 protein. [Os04t0517100-01]	NA	3.65331	NA	3.14022	0.0352921	NA	NA
Os06g0493100	bphi008a	rapdb|Conserved hypothetical protein. [Os06t0493100-01]	NA	3.6743	NA	3.26073	0.00398681	NA	NA
Os09g0248100	OsFLA11	rapdb|FAS1 domain domain containing protein. [Os09t0248100-01]	NA	3.70219	NA	3.9067	0.0244876	NA	NA
Os09g0554300	OsPILS7a	rapdb|Auxin efflux carrier domain containing protein. [Os09t0554300-01]	NA	3.73433	NA	1.90906	0.022322	NA	NA
Os05g0127200	OsPLC4	rapdb|Similar to Phospholipase C (Fragment). [Os05t0127200-01]	NA	3.75997	NA	2.5408	0.0119219	NA	NA
Os11g0448700	OsRALF-31	rapdb|Hypothetical protein. [Os11t0448700-01]	NA	3.82142	NA	5.66737	0.0214669	NA	NA
Os11g0155100	OsFbox568	rapdb|Cyclin-like F-box domain containing protein. [Os11t0155100-01]	NA	3.82644	NA	4.02773	0.0249568	NA	NA
Os03g0102700	OsEXPB7	rapdb|Similar to Expansin-B7. [Os03t0102700-01]	NA	3.86089	NA	3.92709	0.0432761	NA	NA
Os03g0700700	OsLOX1	rapdb|Similar to Lipoxygenase. [Os03t0700700-03]	NA	3.93984	NA	2.12946	0.0432817	NA	NA
Os05g0399300	NA	rapdb|Similar to Chitinase. [Os05t0399300-01]	NA	3.95281	NA	4.49065	0.0252195	NA	NA
Os06g0724800	OsbHLH155	rapdb|Basic helix-loop-helix dimerisation region bHLH domain containing protein. [Os06t0724800-01]	NA	4.03084	NA	2.77788	0.0370323	NA	NA
Os07g0691300		rapdb|Wound-induced protein, Wun1, subgroup domain containing protein. [Os07t0691300-01]	NA	4.0485	NA	2.82153	0.0419359	NA	NA
Os01g0775400	OsCKX5	rapdb|Similar to Cytokinin dehydrogenase 5 precursor (EC 1.5.99.12) (Cytokinin oxidase 5) (CKO5) (AtCKX5) (AtCKX6). [Os01t0775400-01]	NA	4.05075	NA	3.73629	0.0486974	NA	NA
Os01g0382400	OsPR1#012	rapdb|Similar to Pathogenesis-related protein PRB1-2 precursor. [Os01t0382400-01]	NA	4.14741	NA	2.02657	0.0414652	NA	NA
Os02g0673500		rapdb|Basic helix-loop-helix dimerisation region bHLH domain containing protein. [Os02t0673500-01]	NA	4.25215	NA	1.78397	0.000378573	NA	NA
Os02g0626100	OsPAL	rapdb|Similar to Phenylalanine ammonia-lyase. [Os02t0626100-01]	NA	4.37583	NA	2.93574	0.000776388	NA	NA
Os11g0687100		rapdb|von Willebrand factor, type A domain containing protein. [Os11t0687100-01]	NA	4.42198	NA	5.84501	0.00285212	NA	NA
Os12g0123500		rapdb|Similar to Apyrase precursor (EC 3.6.1.5) (ATP-diphosphatase) (Adenosine diphosphatase) (ADPase) (ATP-diphosphohydrolase). [Os12t0123500-01]	NA	4.68833	NA	1.92687	0.0164788	NA	NA
Os02g0813600		rapdb|Thiolase-like, subgroup domain containing protein. [Os02t0813600-01]	NA	5.48727	NA	5.0158	0.0174592	NA	NA
Os11g0592000	OsPR4c	rapdb|Similar to Barwin. [Os11t0592000-01]	NA	6.3617	NA	3.85488	0.000855648	NA	NA
Os03g0405500		rapdb|Hypothetical conserved gene. [Os03t0405500-02]	NA	6.97034	NA	3.49111	0.000477104	NA	NA
Os12g0559200	NA	rapdb|Lipoxygenase (EC 1.13.11.12). [Os12t0559200-01]	NA	5.71027	4.39474	3.80692	0.0301015	NA	NA
