# Supplementary material for: Differentiation of the High Night Temperature Response in Leaf Segments of Rice Cultivars with Contrasting Tolerance
Source: Int J Mol Sci. 2021 Sep 28;22(19):10451. doi: 10.3390/ijms221910451 (PMC8508630; doi:10.3390/ijms221910451)
Supplement: Supplementary file 1 [file ijms-22-10451-s001.zip › Table S7.xlsx]

## Sheet: raw_data
Suppl. Table S7: Measured and annotated metabolites for six rice cultivars with different sensitivity to HNT analysing leaf segments sheath, basis, middle and tip.
					FW	120.85	120.85	120.85	120.85	120.85	120.85	120.85	120.85	120.85	120.85	120.85	120.85	120.85	120.85	120.85	120.85	120.85	120.85	120.85	120.85	120.85	120.85	116.2	129.5	116.6	118.1	116.1	119.4	122.5	124.1	120.4	118.5	115.2	118	122.8	124.6	125.2	125	121.3	119.2	117.3	117.1	117.3	121.3
					DW_Factor	0.0503667	0.0503667	0.0503667	0.0503667	0.0503667	0.0503667	0.0503667	0.0503667	0.0503667	0.0503667	0.0503667	0.0503667	0.0503667	0.0503667	0.0503667	0.0503667	0.0503667	0.0503667	0.0503667	0.0503667	0.0503667	0.0503667	0.253005	0.253005	0.253005	0.253005	0.253005	0.252726	0.252726	0.252726	0.252726	0.252726	0.230118	0.230118	0.230118	0.230118	0.230118	0.280829	0.280829	0.280829	0.280829	0.280829	0.254176	0.254176
					DW	6.08681	6.08681	6.08681	6.08681	6.08681	6.08681	6.08681	6.08681	6.08681	6.08681	6.08681	6.08681	6.08681	6.08681	6.08681	6.08681	6.08681	6.08681	6.08681	6.08681	6.08681	6.08681	29.3992	32.7642	29.5004	29.8799	29.3739	30.1755	30.959	31.3633	30.4283	29.9481	26.5095	27.1539	28.2584	28.6727	28.8107	35.1036	34.0645	33.4748	32.9412	32.8851	29.8148	30.8315
					Sorbitol	3.574	NA	3.20583	2.18074	1.31943	1.60672	82.2033	51.9862	51.0862	46.8154	68.9764	71.0063	58.3573	57.5674	27.3623	28.9214	49.7926	54.0642	48.5964	45.2052	45.5693	41.8885	66.1827	75.1407	58.5811	47.194	54.6644	54.218	78.46	52.9284	41.0782	52.747	30.5718	60.6397	66.3503	35.0762	32.1266	44.1565	52.3312	51.7828	38.5706	40.4923	62.6647	44.1552
					Sample	multi mix	multi mix	multi mix	multi mix	multi mix	multi mix	blank	blank	blank	blank	blank	blank	blank	blank	blank	blank	blank	blank	blank	blank	blank	blank	leaf basis-Control-CT 9993-5-10-1M	leaf basis-Control-CT 9993-5-10-1M	leaf basis-Control-CT 9993-5-10-1M	leaf basis-Control-CT 9993-5-10-1M	leaf basis-Control-CT 9993-5-10-1M	leaf basis-Control-IR 62266-42-6-2	leaf basis-Control-IR 62266-42-6-2	leaf basis-Control-IR 62266-42-6-2	leaf basis-Control-IR 62266-42-6-2	leaf basis-Control-IR 62266-42-6-2	leaf basis-Control-IR57311	leaf basis-Control-IR57311	leaf basis-Control-IR57311	leaf basis-Control-IR57311	leaf basis-Control-IR57311	leaf basis-Control-IR72	leaf basis-Control-IR72	leaf basis-Control-IR72	leaf basis-Control-IR72	leaf basis-Control-IR72	leaf basis-Control-M202	leaf basis-Control-M202
					Batch	13252gf_3	13257gf_3	13262gf_3	13265gf_3	132671gf_3	13268gf_3	13252gf_4	13252gf_5	13257gf_4	13257gf_5	13262gf_4	13262gf_5	13265gf_4	13265gf_5	132671gf_4	132671gf_5	132671gf_51	132671gf_52	132671gf_53	132671gf_54	13268gf_4	13268gf_5	13252gf_26	13257gf_19	13262gf_32	132671gf_23	13268gf_10	13252gf_34	13257gf_27	13262gf_40	132671gf_31	13268gf_18	13252gf_42	13257gf_35	13265gf_13	132671gf_39	13268gf_26	13252gf_48	13262gf_6	13265gf_19	132671gf_45	13268gf_32	13252gf_10	13252gf_58
Cluster_Text	Class	Name	MPIMP_ID	Derivate	Analyte_ID
10116@1740.49	Acids	Aconitic acid, cis-	M000113	Aconitic acid, cis- (3TMS)	A176002-101	NA	NA	NA	NA	NA	NA	NA	NA	NA	NA	NA	NA	NA	NA	NA	NA	NA	NA	NA	NA	NA	NA	26.7654	19.3186	NA	6.77871	17.1395	NA	17.4515	7.39496	6.77871	15.815	7.45098	9.55395	6.66667	NA	NA	7.67507	15.3672	NA	NA	6.27451	31.9008	6.4986
1286@1790.45	Acids	Azelaic Acid	M000857	Azelaic Acid (2TMS)	A181007-101	100	36.4719	88.8915	48.0199	28.4477	50.5812	NA	NA	NA	NA	NA	NA	NA	NA	NA	NA	NA	NA	NA	NA	NA	NA	NA	NA	NA	NA	NA	NA	NA	NA	NA	3.55275	NA	NA	NA	NA	NA	NA	NA	NA	NA	NA	NA	NA
348@1251.02	Acids	Benzoic acid	M000347	Benzoic acid (1TMS)	A128003-101	8.87119	4.96412	8.64033	5.92226	4.32017	9.26979	3.61826	2.47208	3.61215	4.03382	4.45285	5.29823	3.71526	4.49963	2.60959	2.77265	4.74163	4.82609	3.67062	3.83761	5.93341	6.64759	9.22526	9.90647	8.60117	5.4284	9.19386	5.10503	6.82499	5.24848	6.17482	7.73639	9.7091	6.07483	6.97718	7.10645	8.91832	5.48644	5.62324	6.28014	5.50858	5.54658	5.74904	8.41227
4777@973.14	Acids	Boric-acid	M000000	Boric-acid (3TMS)	A098003-101	NA	NA	22.9986	NA	NA	NA	38.7109	NA	NA	NA	NA	NA	NA	NA	NA	NA	NA	NA	NA	NA	NA	NA	NA	NA	NA	NA	NA	NA	NA	NA	NA	NA	NA	NA	NA	NA	NA	NA	NA	NA	NA	NA	1.25388	NA
1362@1806.41	Acids	Citric acid	M000069	Citric acid (4TMS)	A182004-101	1.01079	0.59737	1.69198	1.03981	0.626276	0.973523	NA	NA	NA	NA	NA	NA	NA	NA	NA	NA	0.0611668	0.0427574	0.0780916	NA	NA	NA	82.5669	86.794	71.219	73.7052	57.6576	57.1941	83.9454	76.376	75.7934	68.902	45.9222	68.9383	83.562	55.5732	59.3424	70.1937	76.9426	62.366	67.7354	69.8044	70.0222	56.5243
1369@1806.48	Acids	Citric acid, 2-methyl-	M000256	Citric acid, 2-methyl- (4TMS) BP	A184011-101	NA	NA	NA	NA	NA	NA	NA	NA	NA	NA	NA	NA	NA	NA	NA	NA	NA	NA	NA	NA	NA	NA	65.672	78.0793	59.0487	62.6442	46.1975	40.8805	75.4823	67.9473	63.7779	58.469	34.013	57.0304	73.3262	45.0673	48.6569	53.2406	66.7311	50.3497	58.1285	62.5588	56.5383	41.3883
3866@1346.89	Acids	Fumaric acid	M000067	Fumaric acid (2TMS)	A137001-101	0.996416	NA	NA	NA	NA	43.4911	NA	NA	NA	NA	NA	NA	NA	NA	NA	NA	NA	NA	NA	NA	NA	NA	10.1959	19.9047	11.2534	18.9455	18.2798	8.42913	21.4297	10.5093	25.2838	13.2568	2.64855	11.8155	8.17787	11.0601	2.3011	8.31095	7.25714	10.055	15.0522	9.1134	7.58364	7.44335
3966@1400.83	Acids	Glutaric acid	M000102	Glutaric acid (2TMS)	A143001-101	NA	NA	NA	NA	NA	NA	NA	NA	NA	NA	NA	NA	NA	NA	NA	NA	NA	NA	NA	NA	NA	NA	NA	NA	NA	NA	NA	NA	NA	NA	NA	NA	NA	NA	NA	NA	NA	NA	NA	NA	NA	NA	NA	NA
4806@1567.38	Acids	Glutaric acid, 2-hydroxy-	M000809	Glutaric acid, 2-hydroxy- (3TMS)	A158010-101	17.9325	NA	25.5274	13.5021	NA	17.0886	NA	NA	NA	NA	NA	NA	NA	NA	NA	NA	NA	NA	NA	NA	NA	NA	6.75171	8.18867	6.20502	4.60591	5.68592	NA	NA	NA	6.7876	NA	NA	6.96314	5.94088	4.98709	NA	NA	NA	NA	NA	2.17344	5.84307	5.38332
4100@1570.56	Acids	Glutaric acid, 2-oxo-	M000571	Glutaric acid, 2-oxo- (1MEOX) (2TMS) MP	A158004-101	74.1642	31.2366	85.1194	48.869	34.4209	47.9605	NA	NA	NA	NA	NA	NA	NA	NA	NA	NA	NA	NA	NA	NA	NA	NA	29.024	36.0103	15.8095	27.0252	25.2594	23.2506	34.2141	25.6221	25.0019	29.0735	5.66374	14.0192	18.6089	14.5243	14.7346	25.874	28.3757	27.6698	29.0705	30.9918	25.3907	20.5328
5253@1067.34	Acids	Glycolic acid	M000886	Glycolic acid (2TMS)	A106002-101	6.02298	NA	6.59122	5.90789	6.9008	5.54314	7.02403	NA	NA	6.83919	6.43831	7.2054	7.64762	6.54165	6.65434	5.56117	2.68676	5.86307	5.8947	5.98712	6.96242	2.29358	5.75551	7.95991	6.69677	6.10561	29.2819	4.95565	6.8895	4.87157	7.07795	30.7577	6.58617	7.0833	8.28531	7.25579	22.2421	6.98244	6.41564	8.50277	NA	31.1939	7.3321	NA
10797@1806.27	Acids	Isocitric acid	M000608	Isocitric acid (4TMS)	A182003-101	NA	NA	NA	NA	NA	NA	NA	NA	NA	NA	NA	NA	NA	NA	NA	NA	NA	NA	NA	NA	NA	NA	38.3533	40.5219	28.6338	35.6858	21.9297	25.7775	46.7718	42.7281	36.9751	38.4843	25.2898	30.4205	46.0169	32.6486	29.9789	46.8525	51.1672	35.6743	45.4419	49.7218	35.0592	22.9376
569@1479.24	Acids	Malic acid	M000065	Malic acid (3TMS)	A149001-101	0.703536	0.333256	0.755446	0.455036	0.358201	0.355528	NA	NA	NA	NA	NA	NA	NA	NA	NA	NA	0.0445436	NA	NA	NA	NA	NA	72.541	87.935	83.5158	68.3667	69.7933	33.7967	44.1292	48.0529	40.6648	40.8384	13.8141	46.7392	64.4084	39.6121	35.389	54.3881	56.5468	68.6506	51.9311	54.6479	76.6886	68.0597
4740@1194.75	Acids	Malonic acid	M000427	Malonic acid (2TMS)	A122003-101	NA	NA	NA	NA	NA	NA	NA	NA	NA	NA	NA	NA	NA	NA	NA	NA	NA	NA	NA	NA	NA	NA	5.56085	8.52307	8.01382	5.82386	4.524	4.69829	4.85999	5.01738	3.89325	6.54874	NA	NA	4.7216	NA	NA	NA	NA	7.02812	4.83871	6.71266	5.01226	NA
23@1113.74	Acids	Oxalic acid	M000070	Oxalic acid (2TMS)	A113002-101	5.86491	9.88133	29.4443	11.8485	13.366	4.66959	7.64706	9.03164	8.34379	7.82463	14.2197	11.9842	13.4776	11.802	11.3795	12.7168	5.30354	5.26225	3.96533	3.70712	3.76245	4.0391	20.8622	47.2495	77.3154	47.9695	26.4867	29.0861	32.1861	48.0459	47.7697	13.5252	21.6427	60.8411	41.6396	87.73	24.6396	31.0261	57.0635	42.7955	53.4113	16.9977	49.708	22.6
8167@1304.68	Acids	Phenylacetic acid	M000899	Phenylacetic acid (1TMS)	A130006-101	7.88064	6.08263	NA	8.11018	12.5861	10.2907	5.92961	NA	4.74369	4.78194	5.89135	6.27391	5.73833	6.35042	11.974	11.8975	8.37796	9.10482	10.2142	7.72762	7.45983	7.03902	5.89135	5.73833	7.38332	9.60214	6.84774	5.77659	5.20275	7.65111	10.2142	7.15379	NA	NA	7.03902	10.3673	7.03902	4.20811	4.97322	6.5417	10.8263	6.42693	NA	4.89671
9407@1073.84	Acids	Pyruvic acid	M000071	Pyruvic acid (2TMS)	A108002-101	NA	NA	NA	NA	NA	NA	NA	NA	NA	NA	NA	NA	NA	NA	NA	NA	9.84127	9.84127	12.1905	7.49206	NA	NA	46.0041	61.7743	86.8969	51.9869	NA	48.8211	56.8939	73.8779	51.7465	NA	51.385	64.0492	25.9048	68.7715	NA	70.6625	23.3651	34.9956	73.4137	NA	27.2381	72.7132
1743@1842.83	Acids	Quinic acid	M000007	Quinic acid (5TMS)	A185001-101	3.5302	1.52074	3.083	2.03072	1.52584	2.16763	NA	NA	NA	NA	NA	NA	NA	NA	NA	NA	0.0838216	0.0864884	0.115742	NA	NA	NA	48.8162	91.977	83.0545	43.8143	47.1195	47.9342	37.6586	27.5392	10.2383	22.8235	10.5799	20.8996	16.8669	13.5192	6.47788	23.8384	19.4195	39.2217	20.012	30.4446	28.1529	51.1661
5727@1508.39	Acids	Salicylic acid	M000220	Salicylic acid (2TMS)	A152003-101	1.19048	NA	3.21553	1.8482	1.60484	NA	NA	NA	NA	NA	NA	NA	NA	NA	NA	NA	NA	NA	NA	NA	NA	NA	2.51907	5.37192	2.92524	2.81155	3.87887	4.48301	7.63426	7.46943	6.59878	7.47984	0.855038	4.86764	4.05067	4.06851	4.47387	5.24667	4.88815	3.54998	5.27842	8.03473	2.59794	2.01263
1287@1794.57	Acids	Shikimic acid	M000607	Shikimic acid (4TMS)	A181002-101	0.493916	0.21582	0.459957	0.309315	0.195591	0.334246	NA	NA	NA	NA	NA	NA	NA	NA	NA	NA	0.0439699	0.0492088	0.0688549	0.0209558	NA	NA	54.3095	82.5996	90.7624	43.6215	43.1956	33.1799	35.3571	27.3412	15.6123	28.0211	9.96265	18.8194	20.4561	20.6528	8.61527	30.3289	29.058	46.5787	25.9067	28.5109	46.0122	42.8623
10234@1779.15	Acids	Shikimic acid, 3-dehydro-	M000993	Shikimic acid, 3-dehydro- (1MEOX) (3TMS) MP	A178022-101	NA	NA	NA	NA	NA	NA	NA	NA	NA	NA	NA	NA	NA	NA	NA	NA	NA	NA	NA	NA	NA	NA	47.297	93.8498	55.4295	47.4561	52.9321	42.6468	84.8163	52.0539	37.5591	58.4779	25.0563	44.8511	46.9182	34.7312	NA	82.2454	39.0131	61.7811	46.2587	41.4666	48.1372	47.4068
5738@1310.03	Acids	Succinic acid	M000074	Succinic acid (2TMS)	A134001-101	1.35252	NA	NA	NA	NA	NA	NA	NA	NA	NA	NA	NA	NA	NA	NA	NA	NA	NA	NA	NA	NA	NA	8.28376	12.3947	9.06211	7.12968	3.74694	7.10562	10.8237	8.79559	6.54152	11.4471	1.5611	6.03646	9.01464	3.30249	3.65436	5.44907	5.47079	6.72455	4.19137	6.31551	6.64771	5.27008
7746@1763.70	Acids	Vanillic acid	M000866	Vanillic acid (2TMS)	A178004-101	NA	NA	NA	NA	NA	NA	NA	NA	NA	NA	NA	NA	NA	NA	NA	NA	NA	NA	NA	NA	NA	NA	42.1435	42.3437	41.1645	NA	NA	NA	30.147	22.6069	NA	NA	NA	25.8582	NA	NA	NA	25.3566	NA	NA	NA	NA	22.3765	55.133
5233@1088.39	Amino Acids	Alanine	M000026	Alanine (2TMS)	A110001-101	3.0992	1.66998	2.60867	3.36916	1.77605	1.44365	9.97618	17.6738	17.7269	18.2394	24.4509	22.8082	18.1532	20.2536	15.7476	13.5607	12.7809	13.3889	13.1546	15.0784	7.62499	4.80776	17.7116	34.6083	27.1145	13.7098	22.9671	8.0117	28.2329	29.2715	7.78648	13.6816	2.92487	20.9306	24.7797	6.96418	4.56686	3.82988	9.52757	26.0409	5.53126	22.299	15.0093	10.3708
6711@1369.21	Amino Acids	Alanine, 3-cyano-	M000466	Alanine, 3-cyano- (2TMS)	A138005-101	NA	NA	NA	NA	NA	NA	NA	NA	NA	NA	NA	NA	NA	NA	NA	NA	NA	NA	NA	NA	NA	NA	6.10932	NA	9.24437	4.91271	6.78566	3.22083	4.62219	6.91318	5.40642	9.80707	NA	3.56308	8.88264	6.00976	8.80225	7.27492	NA	8.56109	5.5817	12.2186	NA	4.88886
503@1423.53	Amino Acids	Alanine, beta-	M000027	Alanine, beta- (3TMS)	A144001-101	15.287	4.6459	20.3475	9.86462	4.81359	17.8262	NA	NA	NA	NA	NA	NA	NA	NA	NA	NA	NA	NA	NA	NA	NA	NA	1.09726	0.502883	1.49174	1.67571	1.14862	1.19153	0.559628	1.07538	1.06169	1.3919	0.271311	0.793402	0.970899	0.944465	0.962339	0.931397	0.894035	1.0286	0.957486	0.980399	0.661214	0.926877
854@1666.25	Amino Acids	Asparagine	M000013	Asparagine (3TMS)	A168001-101	0.191795	0.0845292	0.211984	0.111425	0.0782856	0.127274	NA	NA	NA	NA	NA	NA	NA	NA	NA	NA	NA	NA	NA	NA	NA	NA	0.111425	0.0590744	0.703384	2.61579	NA	0.122912	0.0835687	0.178503	0.350168	NA	NA	0.305306	0.048028	0.239215	NA	0.139145	0.197362	0.248199	0.193887	NA	NA	0.0730025
5644@1511.24	Amino Acids	Aspartic acid	M000033	Aspartic acid (3TMS)	A152002-101	5.1781	3.13325	2.47848	4.64345	5.22411	2.69228	6.99211	5.24406	2.83641	2.75396	6.39084	7.01884	2.07784	2.3252	NA	NA	1.22697	1.19127	2.04201	2.15283	2.88185	3.04117	21.0335	43.2167	41.8009	54.8656	31.6408	17.6854	50.8053	38.9187	24.0636	25.3356	2.42035	24.2843	31.4658	22.8158	10.6885	10.6095	18.1326	21.443	18.6406	16.1606	39.9099	15.812
754@1532.30	Amino Acids	Butanoic acid, 4-amino-	M000114	Butanoic acid, 4-amino- (3TMS)	A153003-101	0.555442	NA	0.523528	0.499945	NA	0.527926	NA	NA	NA	NA	NA	0.43082	NA	NA	NA	NA	NA	NA	0.328244	NA	0.35169	0.35169	13.0691	14.6923	6.06783	4.9273	14.4663	12.5067	16.31	5.76349	6.06202	21.4938	10.993	9.28522	6.75615	5.51405	13.6213	10.5373	8.38506	6.7107	6.04512	15.6036	16.2014	7.28985
1273@1722.84	Amino Acids	Caproic acid, 6-amino-	M000829	Caproic acid, 6-amino- (3TMS)	A174006-101	39.813	24.9802	100	56.8048	26.5847	44.814	NA	NA	NA	NA	NA	NA	NA	NA	NA	NA	NA	NA	NA	NA	NA	NA	NA	NA	NA	NA	NA	NA	NA	NA	NA	NA	NA	NA	NA	NA	NA	NA	NA	NA	NA	NA	NA	NA
683@1615.77	Amino Acids	Glutamic acid	M000036	Glutamic acid (3TMS)	A163001-101	NA	NA	NA	0.0432066	0.0417892	NA	NA	NA	NA	NA	NA	NA	NA	NA	NA	NA	NA	NA	NA	NA	NA	NA	27.3821	35.6375	47.3068	46.2714	19.1402	27.5083	48.3162	51.0467	43.8607	7.52985	2.2435	38.1971	45.658	39.7779	3.75099	25.7885	42.9977	45.4701	37.9769	7.86126	17.5462	18.4742
8629@1779.02	Amino Acids	Glutamic acid, N-acetyl-	M000669	Glutamic acid, N-acetyl- (2TMS)	A177012-101	19.1733	NA	18.2325	10.8423	NA	11.392	NA	NA	NA	NA	NA	NA	NA	NA	NA	NA	NA	NA	NA	NA	NA	NA	63.5514	77.8013	73.3347	50.4091	57.8597	49.9378	55.9651	33.7601	26.6716	27.614	18.6579	40.0085	47.0267	23.0662	11.8449	31.0629	29.0011	41.6748	21.8099	28.4696	59.4652	44.0077
6293@1593.19	Amino Acids	Glutamine	M000032	Glutamine [-H2O] (3TMS) MP	A160005-101	NA	NA	NA	NA	NA	NA	NA	NA	NA	NA	NA	NA	NA	NA	NA	NA	NA	NA	NA	NA	NA	NA	14.7449	18.4969	12.6886	12.2636	21.1918	8.94756	23.6475	12.2155	8.02453	20.3933	2.53323	11.3758	12.321	10.805	7.18373	10.0473	10.8046	12.6062	11.2726	9.80943	15.5695	9.77922
3894@1303.84	Amino Acids	Glycine	M000031	Glycine (3TMS)	A133001-101	2.03729	0.673052	0.487008	1.20746	0.72689	3.21689	NA	NA	NA	NA	NA	NA	NA	NA	NA	NA	NA	NA	NA	NA	NA	NA	21.1888	15.072	25.6073	33.2647	19.1015	21.0039	11.8968	13.5766	24.5989	19.1869	4.12525	9.98841	14.4402	13.4524	9.20354	13.0501	13.8099	23.7225	21.3144	17.485	7.74478	10.9061
6394@1175.32	Amino Acids	Isoleucine	M000017	Isoleucine (1TMS)	A119002-101	18.0283	4.90174	8.11561	13.5778	4.75984	4.13285	70.3526	10.5747	6.98698	7.47507	19.8446	20.11	19.6768	18.6249	8.10798	8.11504	19.1354	19.0594	19.2789	13.8141	6.59853	6.06452	0.705816	1.07284	1.11989	0.625823	0.545831	NA	NA	0.743459	0.686994	1.1246	NA	NA	0.90815	NA	4.34465	0.621118	0.508187	0.983437	0.555242	0.884623	0.578769	0.559947
4392@1911.79	Amino Acids	Lysine	M000014	Lysine (4TMS)	A192003-101	NA	NA	NA	NA	NA	NA	NA	NA	NA	NA	NA	NA	NA	NA	NA	NA	NA	NA	NA	NA	NA	NA	4.38853	4.84024	3.75867	2.49301	3.90598	3.68515	5.31724	2.25782	2.0913	2.7959	2.8192	3.98651	4.05571	2.0181	1.67534	2.30772	1.82104	2.37651	3.00559	NA	4.4607	4.07335
512@1416.53	Amino Acids	Methionine	M000018	Methionine (1TMS)	A142007-101	7.31293	NA	NA	5.7398	NA	NA	NA	NA	NA	NA	NA	NA	NA	NA	NA	NA	NA	NA	NA	NA	NA	NA	4.7619	NA	8.2483	7.52551	9.35374	NA	NA	NA	5.05952	5.9949	NA	NA	7.78061	NA	6.63265	7.05782	7.22789	5.18707	7.10034	6.84524	5.22959	5.35714
1051@1629.72	Amino Acids	Phenylalanine	M000011	Phenylalanine (2TMS)	A164001-101	8.83018	3.80671	8.88232	1.52494	0.0936359	2.97016	NA	NA	NA	NA	NA	NA	NA	NA	NA	NA	NA	NA	NA	NA	NA	NA	NA	0.88945	0.284485	0.541683	0.209635	0.171587	3.07409	0.259284	0.341211	0.498344	0.466803	0.323802	0.0845329	0.306325	0.200062	0.261869	0.292643	0.321585	0.291299	0.435263	NA	0.605583
6717@1179.41	Amino Acids	Proline	M000029	Proline (1TMS)	A117006-101	2.13678	1.13984	4.30589	1.59238	1.16026	4.07957	6.73188	0.307928	0.289214	0.466145	1.36611	0.534195	0.289214	0.302824	0.665192	0.190541	0.501772	0.577343	0.557547	0.54796	0.910174	0.609051	0.956108	1.09391	1.10922	0.790271	1.03947	0.95595	0.736645	0.937503	0.872747	1.01512	0.901944	1.11773	1.14665	0.830672	0.965669	1.03285	0.583532	0.894862	0.985649	0.99169	0.566519	0.822351
767@1523.86	Amino Acids	Pyroglutamic acid	M000037	Pyroglutamic acid (2TMS)	A153002-101	4.80896	1.68471	5.99809	4.59682	1.43249	3.98935	NA	NA	NA	NA	NA	NA	NA	NA	NA	NA	4.14705	2.86931	3.58664	2.98139	NA	NA	35.0872	41.9949	39.1974	36.7388	31.6285	31.0346	47.0339	36.7168	28.9999	25.7527	6.71415	31.124	38.808	26.8876	13.3717	22.2412	31.3093	34.6604	28.658	27.2432	28.8971	22.1477
379@1352.51	Amino Acids	Serine	M000015	Serine (3TMS)	A138001-101	2.43478	NA	5.49565	1.68116	NA	5.43768	3.36232	1.70435	1.50725	1.55362	7.21159	8.4058	1.82029	2.28406	1.68116	2.21449	5.15942	7.45507	7.29275	8.66087	6.8058	8.66087	1.66957	4.30145	2.34203	33.9964	2.99849	1.11832	3.28116	1.91304	9.36929	2.82899	1.95942	11.3236	4.92952	10.3569	2.07536	0.850077	3.63395	7.50086	11.1231	3.08723	1.76232	3.38908
8114@1500.87	Amino Acids	Serine, N-acetyl-	M000023	Serine, N-acetyl- (2TMS)	A151001-101	NA	NA	NA	NA	NA	NA	NA	NA	NA	NA	NA	NA	NA	NA	NA	NA	NA	NA	NA	NA	NA	NA	17.9004	30.9657	28.5564	25.1704	23.2684	36.3246	62.8957	33.9506	30.821	25.5504	18.8008	35.5045	36.938	26.3406	13.3663	26.6936	33.8861	38.4678	28.7342	26.1454	20.1281	11.5949
426@1377.88	Amino Acids	Threonine	M000016	Threonine (3TMS)	A140001-101	0.136013	0.100972	0.171901	0.609097	0.0745432	0.0799645	NA	NA	NA	NA	0.0363167	0.0514704	NA	NA	NA	NA	NA	NA	NA	NA	0.0488577	0.0556508	10.7352	0.128762	16.2084	15.3284	13.031	4.31729	0.189423	5.98642	10.6873	5.37632	0.0305687	6.94998	8.00852	6.76207	2.06983	3.17993	6.17112	6.58556	8.0232	6.04912	0.191973	8.74933
2608@2215.66	Amino Acids	Tryptophan	M000012	Tryptophan (3TMS)	A223001-101	0.730906	NA	0.940208	0.737263	0.434876	0.169655	NA	NA	NA	NA	NA	NA	NA	NA	NA	NA	NA	NA	NA	NA	NA	NA	NA	NA	NA	NA	NA	NA	NA	NA	NA	NA	NA	NA	NA	NA	NA	NA	NA	NA	NA	NA	NA	NA
223@1207.00	Amino Acids	Valine	M000030	Valine (2TMS)	A122001-101	0.19744	0.106795	1.88073	0.181523	0.101507	3.16135	NA	NA	NA	NA	3.78074	4.07866	NA	NA	NA	NA	NA	NA	NA	NA	3.40876	4.39706	1.83721	2.29676	2.1497	1.89731	1.88392	0.708762	1.7368	1.32626	0.755781	1.30525	0.206841	1.20181	1.10434	0.602027	1.08117	0.517979	1.35855	1.75014	0.593083	1.20826	1.12444	0.97242
2218@2045.83	Fatty Acids	Hexadecanoic acid	M000483	Hexadecanoic acid (1TMS)	A205001-101	64.5698	26.144	60.6431	34.8661	23.1971	26.3204	76.9071	40.5475	27.7739	25.6711	49.749	49.1736	39.3652	41.5602	22.6274	24.341	37.3686	38.758	44.2143	40.3825	29.6396	20.1052	63.1029	52.0155	60.2004	46.4519	35.18	75.3327	55.0797	51.8734	43.5328	38.6178	68.0288	55.5136	64.3141	48.8057	38.5435	65.3901	58.5553	62.6886	57.6617	32.836	60.9415	57.7674
2837@2242.53	Fatty Acids	Octadecanoic acid	M000485	Octadecanoic acid (1TMS)	A225002-101	53.8206	19.5127	46.7188	29.2243	17.8157	21.1716	49.0514	24.3506	17.1008	14.1631	33.7732	30.3133	29.5855	28.5603	15.5321	14.5445	23.807	25.9589	27.2526	27.0239	17.9066	11.0718	43.344	35.2922	41.4858	28.5265	24.5582	50.8397	34.6823	32.1911	27.7608	24.7355	49.3682	37.7157	46.5096	30.9374	26.9978	45.833	37.7759	42.0379	34.4618	20.6187	40.8341	40.8265
5237@1087.31	Internal Standard (Quantification)	Alanine, d4-	M000026	Alanine, d4- (2TMS)	A110001-211	4.04171	1.26593	2.53723	1.90638	2.21871	0.9098	33.0668	52.0316	56.0686	62.8009	85.2925	84.644	63.7309	70.4666	49.5492	48.7329	51.6323	56.3778	52.8641	63.6538	21.3619	19.4342	49.9326	72.5824	52.089	27.8459	39.1698	22.2252	76.1413	78.619	23.0546	34.4778	12.8239	51.4127	67.006	17.7194	15.4525	17.4747	27.6092	60.7441	16.6822	46.5152	41.0482	23.9539
4309@1919.21	Internal Standard (Quantification)	Sorbitol, U-13C-	M000055	Sorbitol, U-13C- (6TMS)	A193001-111	3.574	NA	3.20583	2.18074	1.31943	1.60672	82.2033	51.9862	51.0862	46.8154	68.9764	71.0063	58.3573	57.5674	27.3623	28.9214	49.7926	54.0642	48.5964	45.2052	45.5693	41.8885	66.1827	75.1407	58.5811	47.194	54.6644	54.218	78.46	52.9284	41.0782	52.747	30.5718	60.6397	66.3503	35.0762	32.1266	44.1565	52.3312	51.7828	38.5706	40.4923	62.6647	44.1552
360@1925.30	Internal Standard (Quantification)	Sorbitol, U-13C-	M000055	Sorbitol, U-13C- (6TMS)	A193001-111	NA	NA	NA	NA	NA	NA	NA	NA	NA	NA	NA	NA	NA	NA	NA	NA	NA	NA	NA	NA	NA	NA	27.2315	55.7036	65.1949	30.711	16.6415	28.2905	38.0711	63.9206	31.1649	NA	NA	35.29	NA	48.3008	NA	18.7595	67.5601	NA	32.2239	NA	41.9336	NA
4@999.86	Internal Standard (Retention Time)	Decane, n-	M000515	Decane, n-	A100003-101	74.2755	39.4276	87.3025	47.2452	27.4676	33.6549	88.9745	51.7934	47.7502	51.0739	71.7891	73.5442	55.7668	57.6288	33.3624	35.6679	59.5128	59.3661	60.1798	58.7242	27.5433	26.4218	54.3401	66.644	70.2532	62.0718	25.9488	55.9437	61.2811	60.3193	61.3471	25.7524	55.9291	58.7567	63.167	59.8322	28.2332	55.6562	71.4876	56.4387	61.9912	20.6961	55.295	52.4692
2625@2199.99	Internal Standard (Retention Time)	Docosane, n-	M000550	Docosane, n-	A220001-101	86.2691	43.8474	89.3887	43.5647	24.7342	28.2423	100	56.7461	47.1158	54.4183	71.853	74.2431	56.7836	56.7676	26.7765	26.5479	41.5115	44.2826	46.4488	44.1665	29.3499	29.5638	71.8766	66.9378	60.1165	38.6878	31.7607	75.2987	67.5612	56.9871	39.2865	33.0908	72.9489	63.3363	67.1023	39.3266	31.1462	70.1605	66.6101	60.7108	39.9395	28.0303	69.9616	64.744
218@1200.01	Internal Standard (Retention Time)	Dodecane, n-	M000424	Dodecane, n-	A120001-101	67.3709	37.8726	90.3431	51.6601	30.2365	27.4037	81.8411	46.6648	43.1492	48.1478	79.2448	78.491	59.6077	63.3439	35.5828	37.1842	71.6089	70.5958	74.0328	72.3015	28.3294	27.7673	55.7493	60.9631	70.0659	71.1285	30.6908	56.7656	57.6549	68.2607	70.5045	32.1607	59.5086	57.7798	66.5114	68.616	33.1121	58.0228	75.5496	62.1498	66.5058	32.8346	50.7532	53.3576
3561@3200.00	Internal Standard (Retention Time)	Dotriacontane, n-	M000567	Dotriacontane, n-	A320001-101	78.8554	38.7533	79.62	46.5867	25.6502	30	100	51.5418	40.9635	44.437	70.5914	69.8713	54.2846	57.9937	24.3604	24.8768	39.2762	42.9869	47.0716	45.1792	27.2052	28.5773	58.9885	54.5476	51.7591	37.592	33.3761	70.0738	57.0366	55.733	42.073	35.4592	66.7154	54.5523	62.0377	43.4371	35.7396	67.9051	68.9166	47.4106	33.3775	25.2396	53.612	62.6992
3750@3600.00	Internal Standard (Retention Time)	Hexatriacontane, n-	M000570	Hexatriacontane, n-	A360001-101	75.9887	38.0597	72.6378	46.7059	24.0767	20.2906	100	51.6753	39.1476	44.4736	62.9244	60.9415	51.5166	51.7272	19.3813	19.6186	17.6424	17.956	18.6605	16.7662	13.7357	17.0574	54.5745	48.8671	47.9087	35.5379	28.3899	57.0957	50.7948	43.4452	35.3316	27.3927	51.9296	44.2245	57.5421	35.3825	26.8989	51.743	66.468	46.2319	26.6714	19.1841	56.607	43.0273
1615@1900.00	Internal Standard (Retention Time)	Nonadecane, n-	M000543	Nonadecane, n-	A190001-101	67.3148	36.016	72.0611	37.2318	23.1834	25.429	73.3606	41.2016	37.0882	39.8797	54.4358	55.8875	38.7971	43.1528	22.3689	23.5708	35.857	39.9044	43.5587	40.4823	23.7753	23.9493	63.5147	58.7762	52.3121	38.6226	29.9411	62.3763	60.8268	49.4802	37.9018	31.2357	60.462	54.2185	54.3349	38.7181	30.3974	60.1404	58.4278	50.0035	38.3927	26.4422	57.3609	55.8286
3622@2800.00	Internal Standard (Retention Time)	Octacosane, n-	M000563	Octacosane, n-	A280001-101	86.9813	44.2506	82.89	48.1089	28.0724	32.8688	99.3672	54.51	43.2659	46.3362	67.8542	70.1344	54.6066	54.7546	27.533	24.8073	42.0986	46.2009	48.0693	48.2639	28.6338	33.0606	46.4116	51.2209	45.7982	34.5784	29.5677	56.4323	51.8515	51.2544	37.2449	31.5196	63.4791	50.6149	51.562	33.2703	34.5317	53.9637	52.6542	47.431	32.5776	27.9076	48.8356	53.815
1277@1800.00	Internal Standard (Retention Time)	Octadecane, n-	M000539	Octadecane, n-	A180008-101	87.6276	47.847	96.0194	48.8898	30.9433	37.7579	91.1075	52.266	47.9847	51.6093	68.8381	70.9241	49.4019	56.1942	30.3982	31.9399	49.8465	56.3184	60.7649	56.8427	32.3524	30.8338	78.6494	84.4407	73.5248	57.4117	41.4855	79.8715	77.8163	64.015	53.5807	42.725	77.134	73.2588	71.1306	54.3119	39.4672	78.9078	77.9636	65.9033	54.1713	32.1867	74.5927	73.7891
644@1500.00	Internal Standard (Retention Time)	Pentadecane, n-	M000535	Pentadecane, n-	A150001-101	58.1048	37.7076	79.9632	44.9322	31.9692	32.3533	71.9587	41.5733	41.7301	46.387	64.6068	65.8703	49.9875	57.7353	37.2171	38.9119	67.4038	71.4526	73.1112	72.1122	33.8014	33.8588	61.3576	70.7539	68.4784	62.5512	41.3703	61.6523	69.2557	60.95	64.1618	40.5053	60.651	68.1834	69.7485	62.7682	41.2507	63.1543	74.1784	63.6606	65.4496	40.3724	60.3488	58.5219
169@1123.67	MSTs	A112003-101	M000000	A112003-101	A112003-101	11.332	5.82814	11.6288	10.3566	4.6021	7.85271	5.28919	4.36113	5.07332	7.21557	16.7062	15.8862	12.9731	14.9008	6.30421	7.01396	32.6678	35.4273	37.0438	36.9173	17.6723	17.9609	33.0417	24.6763	55.5025	38.5431	55.5643	37.9743	35.926	55.0988	42.8951	68.1709	41.9173	36.3207	39.9882	47.6408	73.1919	48.0311	22.1393	48.2029	48.1655	86.5047	13.637	48.6446
7110@1185.42	MSTs	A118006-101	M000000	A118006-101	A118006-101	13.1915	8.10235	14.7513	9.11514	7.08955	13.9539	NA	NA	NA	NA	NA	NA	NA	NA	NA	NA	NA	NA	NA	NA	NA	NA	12.3152	15.0429	13.1271	13.4328	12.958	7.35608	13.8498	15.3877	16.5444	11.9907	NA	7.40938	12.3794	9.61882	7.46269	7.35608	6.98294	8.36887	10.2819	12.6804	9.43497	8.47548
6724@1222.59	MSTs	A124002-101	M000000	A124002-101	A124002-101	NA	NA	NA	NA	NA	NA	NA	NA	NA	NA	NA	NA	NA	NA	NA	NA	NA	NA	NA	NA	NA	NA	20.0693	27.9568	32.6363	27.1197	26.4673	17.0722	22.5797	27.0596	17.4807	27.4899	14.6681	33.1428	23.2247	28.4007	22.4181	25.2435	17.5802	25.6155	24.0249	23.9827	19.0034	16.2461
3904@1227.94	MSTs	A126003-101	M000000	A126003-101	A126003-101	3.49093	0.817093	4.16791	2.72658	1.87795	5.63744	NA	NA	NA	NA	0.507407	0.62256	0.481689	0.436874	NA	NA	0.477391	0.695081	0.487365	0.496486	NA	NA	22.8138	24.8597	43.5063	27.6833	33.4618	10.107	23.6731	21.2497	18.5655	32.005	11.4899	15.4287	27.0383	40.3078	27.5556	14.5074	14.4521	38.5854	21.3922	29.9668	17.4791	21.1699
6132@1360.60	MSTs	A138004-101	M000000	A138004-101	A138004-101	NA	NA	NA	NA	NA	NA	NA	NA	NA	NA	NA	NA	NA	NA	NA	NA	NA	NA	2.31115	NA	NA	NA	23.1647	31.0482	20.4174	23.5351	16.7967	14.7156	31.8115	22.4083	24.3051	16.1041	11.9623	25.4312	17.5303	21.1239	11.2254	17.3952	12.2467	12.3801	25.3572	19.2293	17.5875	23.8307
5744@1365.76	MSTs	A139005-101	M000000	A139005-101	A139005-101	NA	NA	NA	NA	NA	NA	NA	NA	NA	NA	NA	NA	NA	NA	NA	NA	NA	NA	NA	NA	NA	NA	23.1782	34.5395	23.3162	21.5814	26.7698	8.3522	21.8509	14.4609	14.3423	17.9182	4.32733	14.3489	18.7525	16.5083	10.0207	4.46284	5.18581	5.71398	6.42324	6.1957	21.8262	19.4885
4825@1371.51	MSTs	A140003-101	M000000	A140003-101	A140003-101	NA	NA	NA	NA	NA	35.8974	NA	NA	NA	NA	62.5	74.0385	NA	NA	NA	NA	NA	NA	35.2564	36.5385	76.2821	82.3718	43.7379	69.3578	36.2179	NA	40.7051	NA	57.4716	38.0503	44.8718	43.2692	NA	48.9084	NA	32.0513	37.1553	NA	NA	NA	NA	NA	37.1069	NA
8165@1368.00	MSTs	A140006-101	M000000	A140006-101	A140006-101	NA	NA	NA	NA	NA	NA	NA	NA	NA	NA	NA	NA	NA	NA	NA	NA	NA	NA	NA	NA	NA	NA	NA	NA	23.8872	46.2948	67.5925	39.2341	NA	NA	32.9631	32.5599	NA	78.8808	27.8109	48.9821	13.1855	51.4621	32.5854	35.1355	76.118	60.935	NA	62.5145
7876@1386.82	MSTs	A141003-101	M000000	A141003-101	A141003-101	NA	NA	NA	NA	NA	NA	NA	NA	NA	NA	NA	NA	NA	NA	NA	NA	NA	NA	NA	NA	NA	NA	15.0724	20.7739	22.3104	22.4444	21.2536	19.7687	12.161	7.51955	18.9739	7.93545	4.6914	20.2041	22.8261	13.1984	4.02595	10.1813	17.9015	19.4692	20.6829	13.1925	8.06854	10.6305
3974@1400.10	MSTs	A142003-101	M000000	A142003-101	A142003-101	NA	NA	NA	NA	NA	NA	NA	NA	NA	NA	NA	NA	NA	NA	NA	NA	NA	NA	NA	NA	0.796503	NA	5.61981	6.14841	20.3143	14.6643	7.59351	18.5866	7.72781	16.9965	15.689	12.9576	14.8057	15.9011	14.947	23.5826	12.2368	5.24393	19.0414	13.7809	24.1696	19.0758	11.7314	18.8339
3959@1418.76	MSTs	A143003-101	M000000	A143003-101	A143003-101	51.9744	29.8832	69.3112	43.8709	22.2225	51.3694	19.9754	18.1072	27.4386	34.0245	48.1106	54.0333	22.0632	29.7402	8.67138	14.0223	32.2398	20.8433	20.4518	23.2063	33.7662	41.796	52.8612	4.34473	59.5508	77.1464	70.1999	51.1206	5.77411	58.2606	75.3977	78.7637	35.781	62.3101	71.4561	75.8228	89.7728	53.1277	73.5733	64.0882	75.4591	79.0738	27.0609	49.7156
3960@1428.61	MSTs	A144006-101	M000000	A144006-101	A144006-101	50.098	26.2356	72.2709	40.7222	21.0348	63.3731	18.4932	17.7058	25.5729	31.4169	50.7992	52.9081	25.8349	32.7983	11.5779	16.0208	42.2876	32.5381	32.5405	36.0565	39.1595	49.1477	62.5574	7.76452	66.6189	81.5955	78.8439	59.9165	8.75312	61.8035	75.3956	77.3309	43.2516	72.0629	72.6542	80.1546	84.7968	62.7702	79.2196	63.8914	78.1299	84.9222	38.7887	57.4005
3920@1452.17	MSTs	A147001-101	M000000	A147001-101	A147001-101	52.7118	31.909	77.0525	44.2136	30.6534	56.6222	20.3892	21.1028	30.0469	35.1832	48.3001	53.255	22.6228	33.5393	11.5782	16.0482	50.9505	31.0771	27.1684	22.6862	29.6629	32.0814	59.7552	22.4205	69.5167	80.7263	64.2968	57.8684	24.2528	63.0543	79.9169	68.2852	48.6047	61.8591	77.2283	82.9819	80.229	56.6242	76.3366	66.6957	84.7913	76.9769	40.2991	52.0456
3926@1467.24	MSTs	A148006-101	M000000	A148006-101	A148006-101	1.7613	NA	1.93218	NA	NA	2.36627	1.551	NA	NA	NA	NA	NA	NA	NA	NA	NA	NA	NA	NA	NA	1.94532	1.73502	40.1322	44.1191	43.7956	37.6542	35.3703	15.4542	43.9498	34.2661	29.4435	40.4034	11.258	26.9228	29.2886	33.7606	22.4071	13.9105	19.0687	28.4346	18.5679	21.8193	30.7688	22.2598
774@1541.09	MSTs	A155004-101	M000000	A155004-101	A155004-101	NA	NA	NA	NA	NA	NA	NA	NA	NA	NA	NA	NA	NA	NA	NA	NA	NA	NA	NA	NA	NA	NA	2.97573	3.86101	3.02283	2.35019	3.10713	2.04182	2.94039	1.56217	1.72288	3.28278	1.82891	1.79234	2.47391	2.35767	3.11814	1.88842	1.46644	1.56833	1.35831	3.99944	2.31949	1.84188
4092@1573.42	MSTs	A159003-101	M000000	A159003-101	A159003-101	NA	NA	NA	NA	NA	NA	NA	NA	NA	NA	NA	NA	NA	NA	NA	NA	NA	NA	NA	NA	NA	NA	20.2472	28.6896	22.2571	19.2853	16.5411	16.2572	16.7285	12.7986	10.8677	14.1831	7.77974	16.0983	15.0758	11.8198	12.7387	15.7555	12.9307	19.6799	11.903	18.2199	16.3084	16.4421
7009@1643.01	MSTs	A165002-101	M000000	A165002-101	A165002-101	NA	NA	NA	NA	NA	NA	NA	NA	NA	NA	NA	NA	NA	NA	NA	NA	NA	NA	NA	NA	NA	NA	11.0721	16.1687	13.5325	15.993	12.3902	9.66608	15.29	NA	NA	NA	NA	13.884	15.1142	12.478	NA	11.8629	9.75395	14.7627	9.57821	11.4236	10.8084	NA
1094@1657.67	MSTs	A167004-101	M000000	A167004-101	A167004-101	NA	NA	NA	NA	NA	NA	NA	NA	NA	NA	NA	NA	NA	NA	NA	NA	NA	NA	NA	NA	NA	NA	2.25324	2.28332	3.27389	4.64719	2.41276	NA	2.53633	2.29312	2.38649	NA	NA	NA	2.4327	NA	NA	NA	NA	3.25828	2.58519	NA	NA	NA
1120@1724.55	MSTs	A174005-101	M000000	A174005-101	A174005-101	20.8071	13.7143	44.5975	27.2414	15.0945	23.9638	NA	NA	NA	NA	NA	NA	NA	NA	NA	NA	NA	NA	NA	NA	NA	NA	1.72524	6.72676	1.06801	3.18048	1.28708	NA	2.05712	1.46965	NA	NA	NA	5.12427	4.43905	NA	NA	2.83317	NA	3.04648	2.57958	NA	1.18667	3.62472
1207@1749.30	MSTs	A175008-101	M000000	A175008-101	A175008-101	14.0418	NA	10.6811	8.85351	5.31962	10.9124	NA	NA	NA	NA	NA	NA	NA	NA	NA	NA	NA	NA	NA	NA	NA	NA	1.52468	6.58463	2.57286	3.47992	1.11482	1.01644	1.39185	1.09005	0.911809	0.919283	NA	4.31372	3.99781	0.919283	1.15845	2.55641	0.75516	2.87561	2.67637	0.93423	1.15108	3.8381
1689@1832.22	MSTs	A185003-101	M000000	A185003-101	A185003-101	50.8262	39.4828	77.069	38.9655	NA	57.7586	NA	NA	NA	NA	NA	NA	NA	NA	NA	NA	NA	NA	NA	NA	NA	NA	2.07598	1.92063	NA	NA	1.99124	NA	NA	NA	NA	NA	NA	NA	NA	NA	NA	NA	NA	1.80765	NA	NA	NA	NA
9032@1853.78	MSTs	A186003-101	M000000	A186003-101	A186003-101	NA	NA	NA	NA	NA	NA	NA	NA	NA	NA	NA	NA	NA	NA	NA	NA	NA	NA	NA	NA	NA	NA	24.6954	38.9088	15.1817	21.9567	17.8901	13.4954	22.0095	21.455	12.8918	14.8501	8.75353	41.4181	28.1364	16.0908	15.7209	23.1035	10.1426	21.0379	16.7146	7.50646	21.7966	24.7859
7576@1907.41	MSTs	A190021-101	M000000	A190021-101	A190021-101	NA	NA	NA	9.28793	NA	NA	NA	NA	NA	NA	NA	2.50085	NA	NA	NA	NA	2.30848	1.79925	5.06959	2.50085	NA	NA	1.81057	NA	NA	NA	1.87847	NA	NA	1.82189	1.42582	1.70872	NA	NA	1.99163	NA	NA	NA	2.1161	NA	1.22213	NA	NA	NA
4397@1911.57	MSTs	A192014-101	M000000	A192014-101	A192014-101	NA	NA	NA	NA	NA	NA	NA	NA	NA	NA	NA	NA	NA	NA	NA	NA	NA	NA	NA	NA	NA	NA	43.8674	43.9058	21.6515	18.7657	28.7632	25.6621	41.3156	23.0987	18.3414	19.276	12.3728	27.2091	31.4793	16.9408	12.4031	21.1755	17.7566	13.5131	14.3933	13.3742	29.4987	32.9372
2004@1945.51	MSTs	A196004-101	M000000	A196004-101	A196004-101	5.25146	NA	NA	NA	NA	NA	NA	NA	NA	NA	NA	NA	NA	NA	NA	NA	NA	NA	NA	NA	NA	NA	4.76521	NA	NA	1.75049	NA	1.50042	NA	NA	NA	NA	NA	NA	NA	NA	NA	2.12559	1.68102	2.65351	NA	NA	NA	NA
11879@1992.29	MSTs	A200003-101	M000000	A200003-101	A200003-101	NA	NA	NA	NA	NA	NA	NA	NA	NA	NA	NA	NA	NA	NA	NA	NA	NA	NA	NA	NA	NA	NA	31.3507	65.7467	71.3058	29.368	20.9418	70.0887	28.9963	26.0223	NA	22.3048	31.4746	78.2244	31.3507	32.0942	23.0483	84.8007	22.3048	44.9726	25.2788	23.6679	16.8525	81.4198
9458@2012.27	MSTs	A203004-101	M000000	A203004-101	A203004-101	NA	NA	NA	NA	NA	NA	NA	NA	NA	NA	NA	NA	NA	NA	NA	NA	NA	NA	NA	NA	NA	NA	34.3296	34.1905	28.3256	27.9661	34.7361	27.7921	38.2783	21.1864	22.0339	35.2326	11.6525	23.6229	23.6229	21.1864	18.75	28.9195	18.5381	30.3	20.4449	23.9407	20.8686	23.5169
5129@2015.82	MSTs	A203005-101	M000000	A203005-101	A203005-101	4.52636	NA	4.45414	1.60372	NA	1.31402	NA	NA	NA	NA	NA	NA	NA	NA	NA	NA	NA	NA	NA	NA	NA	NA	45.0365	52.4458	62.8194	23.9945	33.0581	56.3313	55.517	40.8059	30.0155	43.0561	33.5137	31.7342	26.57	33.0131	23.5637	31.2623	39.5771	35.9752	17.9218	33.7665	33.3343	34.4846
7604@2077.35	MSTs	A208008-101	M000000	A208008-101	A208008-101	NA	NA	NA	NA	NA	NA	NA	NA	NA	NA	NA	NA	NA	NA	NA	NA	NA	NA	NA	NA	NA	NA	25.5394	21.1125	16.6889	NA	NA	17.3565	20.812	16.1549	14.4192	NA	NA	NA	18.2911	NA	NA	NA	NA	NA	NA	18.8251	18.9586	16.4219
6634@2127.62	MSTs	A214003-101	M000000	A214003-101	A214003-101	NA	NA	NA	NA	NA	NA	NA	NA	NA	NA	NA	NA	NA	NA	NA	NA	NA	NA	NA	NA	NA	NA	27.4852	27.053	11.6503	12.9567	15.6008	14.7892	25.0963	13.2467	10.6629	11.6282	9.39836	20.758	32.4944	12.4551	11.7704	24.5848	27.4878	24.7959	17.5634	18.0223	22.8636	20.6031
6983@2133.13	MSTs	A214011-101	M000000	A214011-101	A214011-101	NA	NA	NA	NA	NA	NA	NA	NA	NA	NA	NA	NA	NA	NA	NA	NA	NA	NA	NA	NA	NA	NA	NA	NA	NA	NA	NA	NA	NA	NA	NA	NA	NA	NA	NA	NA	NA	NA	NA	NA	NA	NA	NA	NA
2637@2162.60	MSTs	A217004-101	M000000	A217004-101	A217004-101	NA	NA	NA	NA	NA	NA	NA	NA	NA	NA	NA	NA	NA	NA	NA	NA	NA	NA	NA	NA	NA	NA	6.5126	7.16827	3.78039	3.68672	4.84066	1.81244	3.38797	2.20774	1.6341	2.56019	1.09431	2.50559	3.56097	1.6511	1.73579	2.06742	2.44068	1.97688	1.54791	2.06103	5.08345	4.15493
5428@2262.56	MSTs	A228001-101	M000000	A228001-101	A228001-101	10.8966	NA	NA	NA	NA	NA	NA	NA	NA	NA	NA	NA	NA	NA	NA	NA	NA	NA	NA	NA	NA	NA	38.1706	40.6079	24.7401	24.6823	24.401	38.6973	59.3651	47.7067	31.8762	48.1619	12.8563	22.5477	28.9054	16.4028	11.8184	30.2238	31.8225	33.5836	22.7909	26.6375	22.1635	24.1908
2767@2354.04	MSTs	A236001-101	M000000	A236001-101	A236001-101	NA	NA	NA	NA	NA	NA	NA	NA	NA	NA	NA	NA	NA	NA	NA	NA	NA	NA	NA	NA	NA	NA	1.02345	0.648664	NA	NA	0.57659	NA	NA	NA	NA	NA	NA	NA	0.639054	NA	NA	NA	NA	NA	NA	NA	NA	0.504517
2768@2354.52	MSTs	A236005-101	M000000	A236005-101	A236005-101	NA	NA	NA	NA	NA	NA	NA	NA	NA	NA	NA	NA	NA	NA	NA	NA	NA	NA	NA	NA	NA	NA	NA	NA	NA	NA	NA	NA	NA	NA	NA	NA	NA	NA	NA	NA	NA	NA	NA	NA	NA	NA	NA	NA
2728@2361.46	MSTs	A237001-101	M000000	A237001-101	A237001-101	NA	NA	NA	NA	NA	NA	NA	NA	NA	NA	NA	NA	NA	NA	NA	NA	NA	NA	NA	NA	NA	NA	8.86484	10.8946	8.02928	7.4336	4.69076	3.57632	3.74902	3.69436	2.15069	3.79966	2.30885	4.67368	5.44439	3.97278	2.63909	4.64326	3.15013	5.6554	2.52531	4.41966	1.55249	5.97342
2800@2385.46	MSTs	A240002-101	M000000	A240002-101	A240002-101	NA	NA	NA	NA	NA	NA	NA	NA	NA	NA	NA	NA	NA	NA	NA	NA	NA	NA	NA	NA	NA	NA	NA	NA	NA	NA	NA	NA	NA	NA	NA	NA	NA	NA	NA	NA	NA	NA	NA	NA	NA	NA	NA	NA
5816@2387.31	MSTs	A241003-101	M000000	A241003-101	A241003-101	NA	NA	NA	NA	NA	NA	NA	NA	NA	NA	NA	NA	NA	NA	NA	NA	NA	NA	NA	NA	NA	NA	NA	1.3992	NA	1.75204	NA	5.00061	8.65069	5.93746	5.00061	9.98905	5.07361	8.07884	9.73213	4.61127	5.36562	1.55737	1.49653	1.26536	1.46003	NA	NA	NA
5463@2474.44	MSTs	A249001-101	M000000	A249001-101	A249001-101	NA	NA	NA	NA	NA	NA	NA	NA	NA	NA	NA	NA	NA	NA	NA	NA	NA	NA	NA	NA	NA	NA	NA	NA	NA	NA	NA	NA	NA	NA	NA	NA	NA	NA	NA	24.8764	NA	NA	NA	NA	NA	NA	NA	NA
6099@2500.00	MSTs	A252002-101	M000000	A252002-101	A252002-101	NA	NA	NA	NA	NA	NA	NA	NA	NA	NA	NA	NA	NA	NA	NA	NA	NA	NA	NA	NA	NA	NA	NA	NA	NA	NA	NA	NA	NA	NA	NA	NA	NA	NA	NA	NA	NA	NA	NA	NA	NA	NA	NA	NA
3270@2508.59	MSTs	A254009-101	M000000	A254009-101	A254009-101	NA	NA	4.1169	NA	NA	NA	NA	NA	NA	NA	NA	NA	NA	NA	NA	NA	NA	NA	NA	NA	NA	NA	4.85146	7.49636	1.94863	0.697683	10.0957	3.89553	4.56031	2.38921	0.46662	7.7915	1.50197	1.51568	11.5562	0.77232	6.50339	1.60381	3.87837	3.4655	0.782067	8.09948	48.1727	5.58999
3347@2542.84	MSTs	A256001-101	M000000	A256001-101	A256001-101	NA	NA	NA	NA	NA	NA	NA	NA	NA	NA	NA	NA	NA	NA	NA	NA	NA	NA	NA	NA	NA	NA	39.9696	47.7282	33.9558	30.9653	34.9664	45.3155	69.1722	46.2458	23.6232	40.3083	17.2373	44.1349	51.6345	36.0124	19.4815	27.1639	34.4553	36.0357	22.9735	18.7752	16.2271	26.5652
7443@2737.64	MSTs	A275003-101	M000000	A275003-101	A275003-101	NA	NA	NA	NA	NA	NA	NA	NA	NA	NA	NA	NA	NA	NA	NA	NA	NA	NA	NA	NA	NA	NA	NA	31.1295	35.8127	30.5785	NA	NA	35.5372	30.9456	NA	47.1205	NA	NA	44.3601	NA	33.3333	37.9853	43.3242	84.105	NA	49.0658	45.4545	NA
3698@2914.73	MSTs	A295006-101	M000000	A295006-101	A295006-101	NA	NA	NA	NA	NA	NA	NA	NA	NA	NA	NA	NA	NA	NA	NA	NA	NA	NA	NA	NA	NA	NA	32.9484	28.7633	19.57	15.1054	19.1411	20.4364	31.1405	23.294	16.2023	19.7558	9.79999	18.4672	26.5708	13.1642	10.1473	22.0436	17.027	14.3256	12.5384	13.8951	11.2678	22.2259
6679@3079.60	MSTs	A309001-101	M000000	A309001-101	A309001-101	NA	NA	NA	NA	NA	NA	NA	NA	NA	NA	NA	NA	NA	NA	NA	NA	NA	NA	NA	NA	NA	NA	NA	NA	NA	NA	NA	NA	NA	100	NA	NA	NA	NA	NA	NA	NA	NA	NA	NA	NA	NA	NA	NA
5576@3089.09	MSTs	A311002-101	M000000	A311002-101	A311002-101	NA	NA	NA	NA	NA	NA	NA	NA	NA	NA	NA	NA	NA	NA	NA	NA	NA	NA	NA	NA	NA	NA	14.4872	16.1551	11.8853	27.9356	9.99883	16.7256	19.8925	17.6128	17.5961	22.7556	6.15329	13.3236	14.5956	7.3434	11.2072	14.4924	13.7197	16.6506	9.07971	11.7662	4.90777	6.10184
10815@3145.51	MSTs	A316003-101	M000000	A316003-101	A316003-101	NA	NA	NA	NA	NA	NA	NA	NA	NA	NA	NA	NA	NA	NA	NA	NA	NA	NA	NA	NA	NA	NA	NA	NA	NA	NA	NA	NA	NA	NA	NA	NA	NA	NA	NA	NA	NA	NA	NA	NA	NA	NA	NA	NA
6676@3339.53	MSTs	A334002-101	M000000	A334002-101	A334002-101	NA	NA	NA	NA	NA	NA	NA	NA	NA	NA	NA	NA	NA	NA	NA	NA	NA	NA	NA	NA	NA	NA	NA	NA	NA	NA	NA	8.20727	NA	NA	NA	21.7259	NA	8.62036	14.0757	NA	16.4969	NA	8.24683	NA	NA	12.5005	8.93119	NA
5523@3386.70	MSTs	A341005-101	M000000	A341005-101	A341005-101	NA	NA	NA	NA	NA	NA	NA	NA	NA	NA	NA	NA	NA	NA	NA	NA	NA	NA	NA	NA	NA	NA	5.7892	3.25415	2.9406	NA	NA	NA	NA	NA	NA	NA	NA	NA	NA	NA	NA	NA	NA	NA	NA	NA	NA	NA
36@1058.52	MSTs	D106098	M000000	D106098	A106004-101	84.5473	36.8897	96.4053	66.9881	38.8727	47.7779	7.97488	5.23987	2.8964	3.36763	5.72867	6.99749	4.24487	6.56088	1.83437	3.59396	7.96179	8.63551	10.3915	8.23817	6.22641	7.79903	7.91761	7.55616	14.7795	8.02304	18.8508	8.82631	9.07559	13.2707	8.3024	15.9993	8.59732	8.13756	9.02581	10.2568	13.3495	9.75136	7.89646	10.933	11.0821	19.6542	4.8005	9.68279
3742@1163.76	MSTs	D116201	M000000	D116201	A116012-101	10.5224	4.8414	18.0636	8.63279	3.57289	30.2472	2.1796	2.36109	5.3302	6.67766	17.1028	17.6482	11.3985	12.0721	5.23271	6.16445	48.279	50.5577	47.9689	50.2148	33.8323	38.2357	43.8146	42.8067	55.6127	66.9395	50.5053	52.2654	44.616	50.6436	69.0089	51.7667	55.0245	46.828	53.0465	69.0868	54.6034	51.4156	43.4365	50.283	66.7462	49.6164	30.7131	48.0758
2055@1932.07	MSTs	D192781	M000000	D192781	A192023-101	NA	NA	NA	NA	NA	NA	NA	NA	NA	NA	NA	NA	NA	NA	NA	NA	NA	NA	NA	NA	NA	NA	NA	NA	NA	NA	NA	15.9701	NA	NA	NA	NA	NA	NA	NA	NA	NA	NA	NA	NA	NA	NA	NA	NA
5175@2275.18	MSTs	D227284	M000000	D227284	A227009-101	NA	NA	NA	NA	NA	NA	NA	NA	NA	NA	NA	NA	NA	NA	NA	NA	NA	NA	NA	NA	NA	NA	9.47041	11.4946	6.55623	4.95725	6.6924	4.29904	5.26047	3.84519	2.44509	4.5559	1.67694	3.81826	6.0994	1.52548	32.6888	3.34436	3.77194	4.57081	2.55848	4.42703	4.94325	5.00311
3447@2602.59	MSTs	D260482	M000000	D260482	A260006-101	100	38.686	92.2141	53.7068	27.2835	32.7833	46.55	25.3174	10.4311	10.9316	39.8112	40.3167	40.3395	37.8555	16.0713	14.9837	25.4131	32.2322	34.3105	30.3792	13.2474	11.2002	62.6632	43.3594	47.5684	33.5845	21.9751	67.8357	45.7089	47.0797	33.7725	25.4692	80.0641	48.5316	55.7429	35.6858	29.3971	66.1536	46.517	52.2864	35.7529	21.4658	60.5978	55.5892
3644@2787.00	MSTs	D278931	M000000	D278931	A278013-101	89.6135	35.0496	81.2065	50.5882	27.6227	28.5303	51.4226	19.8969	6.21769	6.38862	35.1483	34.997	34.4396	30.5054	14.8613	12.4229	24.5024	26.7653	30.8448	26.9508	8.14852	4.97038	53.598	49.3288	50.8547	35.5653	29.8061	65.8324	50.6513	52.4407	42.7291	31.5635	69.8366	44.8479	57.7813	34.2437	32.0718	63.542	53.4791	53.1377	34.8661	27.6574	56.8691	58.0316
3602@2867.51	MSTs	D285215	M000000	D285215	A285012-101	27.3283	NA	46.4911	24.3273	16.9926	20.9391	NA	NA	NA	NA	NA	NA	NA	NA	NA	NA	NA	NA	NA	NA	NA	NA	19.8011	12.7116	5.34108	6.03242	10.2873	13.4843	20.3773	15.2413	14.9086	21.6729	10.0606	19.1544	33.7621	10.4236	15.3981	14.963	23.2198	10.1725	11.8626	19.2963	15.3816	10.7387
7132@1355.32	MSTs	NA135011	M000000	NA135011 (classified unknown]	A135011-101	NA	NA	NA	NA	NA	NA	NA	NA	NA	NA	NA	NA	NA	NA	NA	NA	NA	NA	NA	NA	NA	NA	NA	34.7131	31.856	40.1175	NA	NA	NA	NA	32.6464	NA	NA	NA	NA	31.856	NA	NA	NA	NA	30.4709	NA	34.0427	NA
438@1379.69	MSTs	NA137012	M000000	NA137012 (classified unknown)	A137012-101	NA	NA	NA	NA	NA	NA	NA	NA	NA	NA	NA	NA	2.11768	NA	NA	NA	NA	NA	NA	NA	NA	NA	2.29748	NA	8.99964	20.8508	4.49473	1.12714	NA	2.04223	17.1582	2.76653	NA	2.52311	7.79902	8.83003	2.71367	2.06091	4.35708	7.43796	14.8503	2.51269	NA	6.15781
558@1455.71	MSTs	NA145015	M000000	NA145015	A145015-101	58.1831	32.1072	76.6665	44.1353	26.5223	60.5891	20.644	20.6467	28.0941	33.1795	47.5903	50.4795	23.5451	29.7556	9.97833	13.1816	50.6089	39.0199	36.2686	32.1255	35.6025	41.3377	58.2728	24.559	62.0032	71.2821	60.0896	56.9083	31.0643	61.8575	70.723	66.9099	46.9583	65.4193	67.0024	72.4278	73.5585	56.8816	69.9884	56.1819	72.3145	69.8874	41.0229	53.6164
5383@1455.97	MSTs	NA145016	M000000	NA145016 (classified unknown)	A145016-101	2.73494	0.564761	4.23182	1.92114	0.573362	2.95838	0.33255	0.34115	0.504558	2.07598	2.17802	2.40151	0.47589	0.619231	NA	NA	2.45047	0.719569	0.642165	0.570495	1.53072	2.14055	37.7256	27.338	24.306	19.1948	40.9989	13.491	65.267	45.5671	33.7092	69.1943	11.7689	24.3462	31.4773	37.4704	17.2811	13.0359	16.2172	13.6188	18.2195	34.0969	34.0307	17.5178
3925@1465.83	MSTs	NA147011	M000000	NA147011 (classified unknown)	A147011-101	NA	NA	NA	NA	NA	NA	NA	NA	NA	NA	NA	NA	NA	NA	NA	NA	NA	NA	NA	NA	NA	NA	38.7921	24.8617	21.877	17.2745	40.3552	11.9791	68.7825	47.405	32.0203	68.3507	12.7564	22.7675	30.5288	35.6753	15.6291	13.4133	15.7747	13.4	16.6415	32.4003	39.5653	17.2625
932@1685.91	MSTs	NA170001	M000000	NA170001 (classified unknown)	A170001-101	NA	NA	6.21782	NA	NA	11.5731	NA	NA	NA	NA	8.86972	10.0927	NA	NA	NA	NA	6.11483	8.35479	9.77085	10.5046	13.3368	15.7827	2.7405	4.27501	2.68285	2.54638	2.27736	2.21109	3.24666	2.06017	2.55133	2.22637	1.53356	2.29281	2.43707	1.92391	1.49922	1.7577	1.69437	1.96968	1.59319	1.81912	2.48736	1.85238
1115@1729.33	MSTs	NA174001	M000000	NA174001	A174001-101	1.1094	0.434112	1.08796	0.605612	0.403027	0.622762	NA	NA	NA	NA	NA	NA	NA	NA	NA	NA	NA	NA	NA	NA	NA	NA	37.5739	40.671	27.0661	24.6413	25.6326	16.9679	36.9765	24.3063	22.6699	24.5779	15.9143	30.5711	43.8082	21.5722	22.6497	22.867	24.3226	21.1646	19.4961	24.5639	38.0203	24.5083
6749@1740.56	MSTs	NA176001	M000000	NA176001 (classified unknown)	A176001-101	NA	NA	NA	NA	NA	NA	NA	NA	NA	NA	NA	NA	NA	NA	NA	NA	NA	NA	NA	NA	NA	NA	33.5893	52.9635	30.503	29.1538	20.7937	26.5594	29.3338	24.8346	20.3175	22.6984	NA	20	19.2063	NA	NA	19.8413	NA	20.4762	NA	NA	27.8884	25.6763
11165@1792.26	MSTs	NA181001	M000000	NA181001	A181001-101	21.627	NA	19.8413	NA	NA	NA	NA	NA	NA	NA	NA	NA	NA	NA	NA	NA	NA	NA	NA	NA	NA	NA	63.7231	80.0851	71.5465	50.253	38.4847	37.6711	40.7257	31.4834	28.4809	31.7283	18.1466	51.5858	41.0702	30.7371	25.5818	43.6914	33.1548	48.928	30.9009	33.2221	47.4026	52.4012
6513@1977.13	MSTs	NA199003	M000000	NA199003 (classified unknown)	A199003-101	3.42057	NA	NA	NA	NA	NA	NA	NA	NA	NA	NA	NA	NA	NA	NA	NA	NA	NA	NA	NA	NA	NA	32.1279	39.0924	34.8688	16.4286	16.3316	16.8466	18.6612	12.6248	11.2122	11.9902	8.45702	16.8451	15.4202	9.63428	9.45968	13.6906	13.0077	16.9592	8.60513	11.4849	29.9493	20.6322
2418@2098.16	MSTs	NA211001	M000000	NA211001	A211001-101	NA	NA	NA	NA	NA	NA	NA	NA	NA	NA	NA	NA	NA	NA	NA	NA	NA	NA	NA	NA	NA	NA	17.9698	19.2545	7.75997	8.25607	12.0758	7.98034	21.7985	12.2605	10.3616	14.4821	8.26992	16.4057	23.0105	12.1565	11.5124	22.0746	21.4804	19.8769	17.7749	16.8583	14.394	11.6909
8889@2117.62	MSTs	NA213001	M000000	NA213001	A213001-101	NA	NA	NA	NA	NA	NA	NA	NA	NA	NA	NA	NA	NA	NA	NA	NA	NA	NA	NA	NA	NA	NA	21.8841	22.3082	11.9452	10.3206	11.6322	11.7527	13.6344	10.0059	8.24056	8.66654	4.86895	12.2471	17.2198	6.38315	5.06257	10.9585	11.0834	13.5193	7.7976	6.98516	16.4127	16.3364
5553@2838.07	MSTs	NA285001	M000000	NA285001 (classified unknown)	A285001-101	47.4419	NA	53.0233	NA	NA	NA	NA	NA	NA	NA	NA	NA	NA	NA	NA	NA	NA	NA	NA	NA	NA	NA	NA	NA	NA	NA	NA	NA	NA	NA	NA	NA	NA	NA	NA	NA	NA	NA	NA	NA	NA	NA	NA	NA
10820@3082.83	MSTs	NA310001	M000000	NA310001 (classified unknown)	A310001-101	NA	NA	NA	NA	NA	NA	NA	NA	NA	NA	NA	NA	NA	NA	NA	NA	NA	NA	NA	NA	NA	NA	NA	NA	NA	NA	NA	NA	NA	NA	NA	NA	NA	NA	NA	NA	NA	NA	NA	NA	NA	NA	NA	NA
6664@3469.27	MSTs	NA346003	M000000	NA346003	A346003-101	NA	NA	NA	NA	NA	NA	NA	NA	NA	NA	NA	NA	NA	NA	NA	NA	NA	NA	NA	NA	NA	NA	15.3478	6.84305	6.1714	NA	NA	4.83834	5.33265	NA	5.64772	NA	NA	NA	NA	NA	NA	5.51068	6.94523	4.77951	NA	NA	NA	NA
6348@1557.14	MSTs	similar to Asparagine Derivate_A157008-101	M000013	similar to Asparagine Derivate	A157008-101	NA	NA	NA	NA	NA	NA	NA	NA	NA	NA	NA	NA	NA	NA	NA	NA	NA	NA	NA	NA	NA	NA	NA	NA	NA	NA	NA	NA	NA	NA	NA	NA	NA	NA	NA	NA	NA	NA	NA	NA	NA	NA	NA	NA
4104@1579.95	MSTs	similar to Asparagine Derivate_A157012-101	M000013	similar to Asparagine Derivate	A157012-101	3.85577	1.64419	2.45324	2.57763	1.90958	2.56238	NA	NA	NA	NA	NA	NA	NA	NA	NA	NA	NA	NA	NA	NA	NA	NA	1.37765	1.6745	1.03559	1.26686	1.39179	1.47124	2.07965	1.47637	1.52102	1.73413	0.911647	1.15482	1.3904	1.58909	0.970567	1.09813	1.76091	1.3886	1.2487	1.56762	1.14125	0.959747
4960@1787.65	MSTs	similar to Fructose Derivate_A180002-101	M000606	similar to Fructose Derivate	A180002-101	NA	NA	NA	NA	NA	NA	NA	NA	NA	NA	NA	NA	NA	NA	NA	NA	NA	NA	NA	NA	NA	NA	NA	NA	5.21186	NA	NA	NA	NA	NA	NA	NA	NA	NA	NA	NA	NA	NA	NA	NA	NA	NA	6.38893	NA
1295@1794.71	MSTs	similar to Fructose Derivate_A181004-101	M000606	similar to Fructose Derivate	A181004-101	NA	NA	NA	NA	NA	NA	NA	NA	NA	NA	NA	NA	NA	NA	NA	NA	NA	NA	NA	NA	NA	NA	20.7089	42.6464	34.9987	26.0693	33.6729	23.4924	29.2664	24.6304	8.43619	27.9979	15.8932	26.3542	30.661	24.9165	15.0638	27.6053	31.6769	36.2214	27.8402	25.4905	34.4501	26.7816
6003@1149.37	MSTs	Unknown#bth-pae-013	M000000	Unknown#bth-pae-013	A116014-101	10.3116	5.67615	13.53	13.8279	11.1168	9.72551	6.10405	2.66065	2.45692	2.96133	5.64913	5.0233	8.14563	7.62518	3.01855	2.568	7.94552	8.06786	9.10206	9.14977	6.12718	5.93172	39.7293	66.5088	45.0159	53.7332	46.8218	22.1	43.6588	35.77	28.1632	28.3913	23.1019	50.8763	54.7415	33.8707	30.1691	25.0584	25.5264	39.2447	38.5936	43.6979	33.2277	30.6227
10350@1377.93	MSTs	Unknown#bth-pae-024	M000000	Unknown#bth-pae-024	A138009-101	NA	NA	NA	NA	NA	NA	NA	NA	NA	NA	NA	NA	NA	NA	NA	NA	NA	NA	NA	NA	NA	NA	31.0595	18.3981	26.781	37.067	55.4785	22.2477	24.5337	24.6499	31.4199	44.7453	NA	14.131	31.0275	30.759	13.3722	8.8024	25.1436	16.6352	31.3449	35.2313	26.4875	14.7476
10851@1408.30	MSTs	Unknown#bth-pae-027	M000000	Unknown#bth-pae-027	A141017-101	NA	NA	NA	NA	NA	NA	NA	NA	NA	NA	NA	NA	NA	NA	NA	NA	NA	NA	NA	NA	NA	NA	NA	NA	NA	NA	NA	NA	NA	NA	NA	NA	NA	NA	NA	NA	NA	NA	NA	NA	NA	NA	NA	NA
9165@1414.67	MSTs	Unknown#bth-pae-028	M000000	Unknown#bth-pae-028	A142016-101	58.1166	25.8337	7.28629	41.4238	11.3779	NA	NA	9.00746	NA	NA	NA	6.99943	NA	NA	NA	NA	6.88468	NA	NA	NA	NA	NA	26.2771	NA	27.6626	39.7828	14.247	24.0282	NA	19.4031	30.432	12.0482	13.253	29.4943	30.0257	25.4118	15.1006	62.4634	48.724	46.4128	51.0691	17.103	8.0895	35.8129
3922@1462.54	MSTs	Unknown#bth-pae-065	M000000	Unknown#bth-pae-065	A146017-101	NA	NA	NA	7.75463	4.39815	NA	NA	NA	NA	NA	NA	NA	NA	NA	NA	NA	NA	NA	NA	NA	NA	NA	31.3072	12.2299	33.022	52.3517	9.375	29.4251	11.4198	23.7772	34.4546	8.29475	NA	23.4502	21.9907	18.3493	7.17593	37.3859	32.0419	52.8144	41.9733	10.8796	12.3071	20.6931
6989@1246.67	MSTs	Unknown#sst-cgl-009	M000000	Unknown#sst-cgl-009	A125011-101	NA	NA	NA	NA	NA	NA	NA	NA	NA	NA	NA	NA	NA	NA	NA	NA	NA	NA	NA	NA	NA	NA	22.7778	25.5293	24.8639	34.7338	18.6594	28.0165	18.432	16.6162	17.1634	18.8586	14.2281	15.7296	24.2832	26.3459	23.0244	21.2445	32.7636	29.9958	31.7228	20.3917	17.5691	17.2701
5271@1717.73	MSTs	Unknown#sst-cgl-054	M000000	Unknown#sst-cgl-054	A173017-101	NA	NA	NA	2.13349	NA	NA	NA	NA	NA	NA	NA	NA	NA	NA	NA	NA	NA	NA	NA	NA	NA	NA	NA	NA	NA	NA	NA	NA	NA	NA	NA	NA	NA	NA	NA	NA	NA	NA	NA	NA	NA	NA	NA	NA
7763@2520.80	MSTs	Unknown#sst-cgl-119	M000000	Unknown#sst-cgl-119	A255012-101	NA	NA	NA	NA	NA	NA	NA	NA	NA	NA	NA	NA	NA	NA	NA	NA	NA	NA	NA	NA	NA	NA	NA	23.6307	19.4053	30.3603	55.4243	NA	27.0736	NA	NA	36.791	NA	NA	63.7669	NA	NA	NA	22.6917	32.7419	NA	NA	68.7174	NA
3849@1365.51	N- Compounds	2-Piperidinecarboxylic acid	M000528	2-Piperidinecarboxylic acid (2TMS)	A137004-101	NA	NA	NA	NA	NA	NA	NA	NA	NA	NA	NA	NA	NA	NA	NA	NA	NA	NA	NA	NA	NA	NA	8.01546	15.3837	10.4491	10.4718	12.6315	1.60909	9.3992	6.16088	6.8011	8.26631	NA	4.92059	8.4191	7.42956	4.39311	2.4055	NA	3.21603	8.08669	5.82615	8.04754	4.3994
9092@1872.59	N- Compounds	Adenine	M000095	Adenine (2TMS)	A188005-101	NA	NA	6.75325	7.39659	5.97443	NA	NA	NA	NA	NA	NA	NA	NA	NA	NA	NA	NA	NA	NA	NA	NA	NA	NA	NA	NA	NA	NA	NA	NA	NA	NA	NA	NA	NA	NA	NA	NA	NA	NA	NA	NA	NA	NA	NA
7967@2794.71	N- Compounds	Adenosine, 5-methylthio-	M001171	Adenosine, 5-methylthio- (3TMS)	A280002-101	NA	NA	NA	NA	NA	NA	NA	NA	NA	NA	NA	NA	NA	NA	NA	NA	NA	NA	NA	NA	NA	NA	NA	NA	NA	NA	NA	NA	NA	NA	NA	NA	NA	NA	NA	NA	NA	NA	NA	NA	NA	NA	NA	NA
6585@3063.95	N- Compounds	Adenosine-5-monophosphate	M000284	Adenosine-5-monophosphate (5TMS)	A307003-101	NA	NA	NA	NA	NA	NA	NA	NA	NA	NA	NA	NA	NA	NA	NA	NA	NA	NA	NA	NA	NA	NA	29.57	34.3236	29.4022	27.5155	29.5342	14.3317	36.6519	12.5837	17.9699	26.9249	NA	15.23	45.1915	14.8997	9.16923	13.7358	34.1431	39.9595	13.8332	12.2583	19.7337	6.18462
10936@1877.63	N- Compounds	Allantoin	M000092	Allantoin (4TMS)	A189007-101	NA	NA	NA	NA	NA	NA	NA	NA	NA	NA	NA	NA	NA	NA	NA	NA	NA	NA	NA	NA	NA	NA	NA	NA	NA	NA	NA	NA	NA	NA	NA	NA	NA	NA	NA	NA	NA	NA	NA	NA	NA	NA	NA	NA
1205@1743.11	N- Compounds	Arginine	M000835	Arginine [-NH3] (2TMS)	A176005-101	NA	NA	38.9197	28.1494	NA	NA	NA	NA	NA	NA	NA	NA	NA	NA	NA	NA	NA	NA	NA	21.2569	NA	NA	NA	NA	NA	NA	NA	NA	NA	NA	NA	NA	NA	NA	NA	NA	NA	NA	NA	NA	NA	NA	NA	NA
264@1260.37	N- Compounds	Ethanolamine	M000096	Ethanolamine (3TMS)	A128002-101	31.6492	13.1212	46.2191	22.7515	9.77913	52.0231	6.69006	6.42017	12.9475	16.3878	32.2544	34.1091	22.8605	26.2612	10.6722	13.2519	43.224	45.6941	46.3753	44.6696	45.3275	46.5225	40.2762	43.5527	47.0042	46.762	41.1312	42.6848	45.367	44.4849	46.7665	42.998	42.1464	43.2897	44.3074	46.1581	46.3896	42.7511	50.304	44.3265	46.9335	41.6026	39.5266	39.1589
10470@2759.58	N- Compounds	Guanosine	M000098	Guanosine (5TMS)	A278001-101	NA	NA	NA	NA	NA	NA	NA	NA	NA	NA	NA	NA	NA	NA	NA	NA	NA	NA	NA	NA	NA	NA	NA	NA	NA	NA	NA	NA	NA	NA	NA	NA	NA	NA	NA	NA	NA	NA	NA	NA	NA	NA	NA	NA
4220@1734.71	N- Compounds	Putrescine	M000186	Putrescine (4TMS)	A175002-101	8.67186	2.81014	10.5976	6.05418	2.44607	4.77246	NA	NA	NA	NA	NA	NA	NA	NA	NA	NA	NA	NA	NA	NA	NA	NA	7.95375	4.93898	6.31103	8.7417	2.62661	5.44187	4.67979	3.77318	5.89686	2.02994	0.749725	3.25517	2.42955	2.48829	1.15738	3.205	3.43043	3.90598	3.03574	1.28842	1.29142	6.3699
8374@1314.09	N- Compounds	Pyridine, 2,3-dihydroxy-	M000439	Pyridine, 2,3-dihydroxy- (2TMS)	A131006-101	NA	NA	NA	NA	NA	NA	NA	NA	NA	NA	NA	NA	NA	NA	NA	NA	NA	NA	NA	NA	NA	NA	NA	NA	NA	NA	NA	NA	NA	NA	NA	NA	NA	NA	NA	NA	NA	NA	NA	NA	NA	NA	NA	NA
41@1034.28	N- Compounds	Pyridine, 2-hydroxy-	M000413	Pyridine, 2-hydroxy- (1TMS)	A105003-101	12.1392	6.82626	16.1883	8.78798	6.26969	15.7418	11.6657	8.75016	7.28571	7.56579	12.8268	13.3446	12.7472	10.106	6.8015	7.13172	10.769	11.9859	12.5704	10.2093	16.9279	16.7539	42.6065	46.0589	32.4821	40.7143	44.0544	27.1455	41.4248	33.3228	40.9869	35.3843	16.0707	27.6572	35.5516	26.686	24.9054	21.6367	29.9308	20.643	31.2757	26.7439	31.7759	25.0233
5776@1136.50	N- Compounds	Pyridine, 3-hydroxy-	M000419	Pyridine, 3-hydroxy- (1TMS)	A114003-101	93.9908	38.5127	100	75.3842	52.7306	82.0381	4.0649	2.15793	1.53737	1.28114	2.58844	2.48204	2.77206	2.55874	1.90397	1.75089	3.48171	3.77028	3.20154	3.48785	3.33585	3.16528	11.712	11.2827	9.90284	13.4901	15.456	7.7518	11.8474	12.7842	13.8578	13.1383	6.22465	8.0338	11.79	9.60529	8.00508	6.29097	7.067	7.22776	9.7219	10.2372	7.34075	8.07583
8002@1154.84	N- Compounds	Pyridine, 4-hydroxy-	M000436	Pyridine, 4-hydroxy- (1TMS)	A117003-101	NA	NA	NA	NA	NA	NA	NA	NA	NA	NA	NA	NA	NA	NA	NA	NA	NA	NA	NA	NA	NA	NA	38.2854	29.5039	21.8047	35.5903	35.8403	19.6345	32.6455	29.3789	43.8802	26.5364	9.98279	16.5627	22.7554	20.2268	14.1136	14.6299	15.3184	12.4785	23.1447	15.9208	18.9212	19.184
4709@2472.18	N- Compounds	Tryptamine, 5-hydroxy-	M000717	Tryptamine, 5-hydroxy- (4TMS)	A248001-101	NA	NA	NA	NA	NA	NA	NA	NA	NA	NA	NA	NA	NA	NA	NA	NA	NA	NA	NA	NA	NA	NA	NA	NA	NA	NA	NA	NA	NA	NA	NA	NA	NA	NA	NA	NA	NA	NA	NA	NA	NA	NA	NA	NA
7146@1335.62	N- Compounds	Uracil	M000456	Uracil (2TMS)	A136001-101	NA	NA	NA	NA	NA	NA	NA	NA	NA	NA	NA	NA	NA	NA	NA	NA	NA	NA	NA	NA	NA	NA	NA	NA	NA	NA	NA	NA	NA	NA	NA	NA	NA	NA	NA	NA	NA	NA	NA	NA	NA	NA	NA	NA
2005@1942.97	Phenylpropanoids	Cinnamic acid, 4-hydroxy-, trans-	M000117	Cinnamic acid, 4-hydroxy-, trans- (2TMS)	A195001-101	43.8413	17.4532	43.7267	25.6198	18.1694	26.8834	NA	NA	NA	NA	NA	NA	NA	NA	NA	NA	5.04826	NA	4.49146	NA	NA	NA	45.5427	43.3201	42.8643	24.8052	22.2575	53.0247	54.9444	52.3278	33.7664	32.5396	27.4881	15.9128	9.54916	7.86273	9.97052	61.607	15.8366	29.1262	35.8917	27.5156	17.5923	40.1576
2429@2096.91	Phenylpropanoids	Ferulic acid, trans-	M000009	Ferulic acid, trans- (2TMS)	A210001-101	45.2306	21.5536	52.711	27.3588	19.6714	34.9968	NA	NA	NA	NA	NA	NA	NA	NA	NA	NA	NA	NA	NA	NA	NA	NA	68.8288	63.0786	49.8725	19.7787	32.4378	55.7054	63.3758	56.1101	29.1463	31.2929	58.3745	58.2291	23.9405	49.9732	27.4971	60.3039	NA	24.3157	34.7136	25.401	28.5595	71.9566
7984@3176.96	Phenylpropanoids	Quinic acid, 5-caffeoyl-, trans-	M000005	Quinic acid, 5-caffeoyl-, trans- (6TMS)	A319001-101	NA	NA	NA	NA	NA	NA	NA	NA	NA	NA	NA	NA	NA	NA	NA	NA	NA	NA	NA	NA	NA	NA	NA	NA	NA	NA	NA	NA	NA	NA	NA	NA	NA	NA	NA	NA	NA	NA	NA	NA	NA	NA	NA	NA
9318@1746.24	Phosphates	Dihydroxyacetone phosphate	M000327	Dihydroxyacetone phosphate (1MEOX) (3TMS) BP	A177006-101	NA	NA	NA	NA	NA	NA	NA	NA	NA	NA	NA	NA	NA	NA	NA	NA	NA	NA	NA	NA	NA	NA	NA	NA	NA	NA	NA	NA	NA	NA	NA	NA	NA	NA	NA	NA	NA	NA	NA	NA	NA	NA	NA	NA
2880@2292.64	Phosphates	Fructose-6-phosphate	M000510	Fructose-6-phosphate (1MEOX) (6TMS) MP	A232002-101	4.7987	NA	4.84544	3.06027	NA	4.51961	NA	NA	NA	NA	NA	NA	NA	NA	NA	NA	NA	NA	NA	NA	NA	NA	48.2399	53.881	36.2447	36.5202	38.714	63.3121	84.7121	46.2985	27.3082	40.4747	21.6579	46.6311	57.1854	35.9666	23.2589	32.2769	34.9384	48.44	29.8715	27.666	28.0882	36.0081
2897@2307.18	Phosphates	Glucose-6-phosphate	M000513	Glucose-6-phosphate (1MEOX) (6TMS) MP	A233002-101	13.3652	4.14655	10.1678	6.89003	3.7055	4.94912	NA	NA	NA	NA	NA	NA	NA	NA	NA	NA	NA	NA	NA	NA	NA	NA	54.7372	62.1272	47.0671	42.8739	48.9039	64.7624	76.9838	53.1745	32.0059	52.8501	24.9287	61.1275	62.8229	35.0759	26.6625	40.1161	39.4724	58.7577	36.827	37.5998	24.5249	40.842
4179@1766.67	Phosphates	Glyceric acid-2-phosphate	M000505	Glyceric acid-2-phosphate (4TMS)	A179005-101	NA	NA	NA	NA	NA	NA	NA	NA	NA	NA	NA	NA	NA	NA	NA	NA	NA	NA	NA	NA	NA	NA	35.6188	56.9561	43.5842	38.5165	49.0556	33.8564	40.5527	31.4817	23.8898	46.3494	NA	34.3118	47.9935	36.5465	25.2261	48.5035	34.8576	52.4691	32.2344	33.3197	49.3777	32.6186
1292@1793.57	Phosphates	Glyceric acid-3-phosphate	M000105	Glyceric acid-3-phosphate (4TMS)	A181003-101	NA	NA	NA	NA	NA	NA	NA	NA	NA	NA	NA	NA	NA	NA	NA	NA	NA	NA	NA	NA	NA	NA	54.9813	97.0223	89.0723	60.742	83.6044	59.5888	72.8936	60.9763	31.3522	62.8458	33.9432	63.9642	72.6837	57.3145	38.6539	68.1531	73.616	85.3368	62.8509	59.115	92.5786	61.3821
10168@1749.57	Phosphates	Glycerol-3-phosphate	M000328	Glycerol-3-phosphate (4TMS)	A177002-101	NA	NA	NA	NA	NA	NA	NA	NA	NA	NA	NA	NA	NA	NA	NA	NA	NA	NA	NA	NA	NA	NA	34.4002	49.6986	34.3203	29.0138	33.3313	30.1254	33.8534	35.61	19.0026	26.2867	26.1885	41.942	26.7536	20.5688	28.0555	30.8686	16.4232	24.6837	26.0166	25.9983	31.9805	34.179
6525@2173.56	Phosphates	Glycerophosphoglycerol	M000834	Glycerophosphoglycerol (5TMS)	A218002-101	NA	NA	NA	NA	NA	NA	NA	NA	NA	NA	NA	NA	NA	NA	NA	NA	NA	NA	NA	NA	NA	NA	19.8629	23.4595	17.1133	11.0933	11.7618	18.4681	23.7236	16.2178	7.87313	18.8282	7.09127	17.3406	18.3407	8.85288	11.0828	12.3266	16.9152	18.7983	12.0822	16.2243	9.94417	8.93296
11345@1590.01	Phosphates	Glycolic acid-2-phosphate	M000668	Glycolic acid-2-phosphate (3TMS)	A157011-101	NA	NA	NA	NA	NA	NA	NA	NA	NA	NA	NA	NA	NA	NA	NA	NA	NA	NA	NA	NA	NA	NA	36.1628	49.0584	76.2518	44.5817	39.1969	40.82	55.7932	42.3178	18.7166	42.4242	26.025	46.7063	57.041	59.3583	37.4332	36.3636	49.3761	51.0166	36.1854	38.9722	56.6682	43.1373
6596@2448.57	Phosphates	Inositol-phosphate	M000124	Inositol-2-phosphate, myo- (7TMS)	A247001-101	86.7961	35.5786	97.8485	52.71	27.6608	48.3318	NA	NA	NA	NA	NA	NA	NA	NA	NA	NA	5.01761	5.67782	6.07394	5.14965	NA	NA	12.2799	13.9965	10.3433	11.1356	7.79049	14.7447	10.0352	7.96655	14.8327	6.82218	12.8521	10.1232	12.1479	6.20599	7.35035	12.2359	8.97887	8.62676	6.82218	NA	10.2113	11.6197
34@1261.19	Phosphates	Phosphoric acid	M000075	Phosphoric acid (3TMS)	A129001-101	3.00328	4.42605	6.36459	7.28319	6.93403	2.83946	2.97597	3.2945	4.03167	3.15799	5.17838	5.0266	6.02491	5.50602	6.23164	4.74711	1.29232	1.78376	NA	NA	NA	NA	19.0221	31.1049	38.1949	32.6374	20.0068	15.8646	15.8374	21.6824	8.41368	3.16017	3.96608	12.5342	2.94472	10.8977	3.5351	10.0087	18.4795	8.84015	14.1207	5.23082	25.915	9.776
6964@1166.40	Phosphates	Phosphoric acid monomethyl ester	M000507	Phosphoric acid monomethyl ester (2TMS)	A119001-101	NA	NA	NA	NA	NA	NA	NA	NA	NA	NA	NA	NA	NA	NA	NA	NA	NA	NA	NA	NA	NA	NA	22.8565	31.2102	27.1989	32.1921	26.2194	18.2948	23.3457	32.2828	18.7076	31.0616	18.3185	38.4144	35.7158	18.817	10.5035	25.096	15.3969	19.9562	29.468	24.1834	20.9345	14.9934
2051@1938.04	Polyhydroxy Acids	Ascorbic acid	M000001	Ascorbic acid (4TMS)	A195002-101	NA	NA	NA	NA	NA	NA	NA	NA	NA	NA	NA	NA	NA	NA	NA	NA	NA	NA	NA	NA	NA	NA	6.22408	3.88931	100	16.7009	2.54609	33.7841	8.6844	6.65238	13.4206	3.4744	16.3105	27.4302	12.5209	12.4378	10.551	23.0278	9.78177	8.39875	6.19529	6.45722	20.9277	26.7123
1758@1841.56	Polyhydroxy Acids	Dehydroascorbic acid dimer	M000082	Dehydroascorbic acid dimer (2MEOX) MP	A185002-101	0.441896	2.39622	9.13156	10.7158	4.42716	1.54545	NA	NA	NA	NA	NA	NA	NA	NA	NA	NA	NA	NA	NA	NA	NA	NA	52.8533	59.4077	28.8769	28.7889	31.2306	35.9391	58.5496	29.4013	30.1496	23.9422	15.48	38.6552	37.5201	21.5436	13.1775	24.9506	24.861	15.4998	16.6319	13.1401	48.5945	33.619
6974@1530.00	Polyhydroxy Acids	Erythronic acid	M999999	Erythronic acid (4TMS)	A154001-101	NA	NA	NA	NA	NA	NA	NA	NA	NA	NA	NA	NA	NA	NA	NA	NA	NA	NA	NA	NA	NA	NA	22.0886	22.5644	15.3887	17.8021	12.6775	11.4735	15.9655	11.0364	13.7586	21.6552	5.81718	12.2329	15.7458	10.2962	11.6657	13.0097	14.0242	12.743	10.7159	17.0746	15.7638	12.0709
2150@2031.03	Polyhydroxy Acids	Galactaric acid	M000594	Galactaric acid (6TMS)	A204001-101	NA	NA	NA	NA	NA	NA	NA	NA	NA	NA	NA	NA	NA	NA	NA	NA	NA	NA	NA	NA	NA	NA	1.06263	1.45372	1.04654	0.555151	1.29555	11.8225	16.664	14.1011	7.36347	13.6582	4.78366	0.336214	0.841673	0.82954	0.696511	12.6046	11.8918	14.1297	8.71681	10.9048	0.969515	0.912469
1966@1981.76	Polyhydroxy Acids	Galactonic acid	M000596	Galactonic acid (6TMS)	A199002-101	NA	NA	NA	NA	NA	NA	NA	NA	NA	NA	NA	NA	NA	NA	NA	NA	NA	NA	NA	NA	NA	NA	60.7932	68.7591	65.0025	39.6249	44.6765	37.1789	29.2259	20.7773	17.2603	15.658	15.6391	30.6068	27.9994	15.9042	15.5367	41.6706	37.8315	41.3319	26.7713	33.9325	41.5389	37.023
8712@1927.85	Polyhydroxy Acids	Galacturonic acid	M000690	Galacturonic acid (1MEOX) (5TMS) MP	A194003-101	NA	NA	NA	NA	NA	NA	NA	NA	NA	NA	NA	NA	NA	NA	NA	NA	NA	NA	NA	NA	NA	NA	4.29082	12.9903	5.75573	4.84704	NA	NA	NA	NA	NA	NA	NA	NA	NA	NA	NA	NA	NA	NA	NA	NA	NA	NA
1840@1986.93	Polyhydroxy Acids	Gluconic acid	M000508	Gluconic acid (6TMS)	A200001-101	4.41848	2.73274	5.95582	2.90562	1.98777	2.93485	NA	NA	NA	NA	NA	NA	NA	NA	NA	NA	NA	NA	NA	NA	NA	NA	0.465329	0.900886	0.489096	0.24499	0.241465	0.644972	0.687233	0.809407	NA	NA	NA	0.20269	1.50682	NA	NA	3.03151	1.55773	0.220315	0.322196	0.888589	1.85193	0.429023
4845@1873.40	Polyhydroxy Acids	Gluconic acid-1,5-lactone	M000638	Gluconic acid-1,5-lactone (4TMS)	A189008-101	8.67725	4.59129	10.8103	6.45055	4.49791	6.6638	NA	NA	NA	NA	NA	NA	NA	NA	NA	NA	NA	NA	NA	NA	NA	NA	5.89483	6.95324	4.99292	4.09361	4.96627	4.9261	5.78502	4.17442	4.38844	4.6714	2.87785	4.56986	5.50001	3.47715	3.21836	5.08324	4.0595	4.94525	3.47582	4.49323	5.24887	4.98188
4747@1321.27	Polyhydroxy Acids	Glyceric acid	M000073	Glyceric acid (3TMS)	A135003-101	0.09101	NA	3.37875	4.12032	4.1456	4.24671	4.97978	NA	2.83114	3.48837	10.7179	10.1871	7.17897	8.46815	9.1001	8.49343	11.1982	10.7432	15.9757	13.8018	9.78261	7.86148	26.9512	42.9286	30.7312	38.6466	21.4854	22.5041	24.8365	22.2495	21.82	21.2034	4.30221	18.0051	15.4506	18.3132	8.61734	22.6022	19.783	33.3875	27.1504	22.22	20.0631	21.6668
6487@1734.81	Polyhydroxy Acids	Lyxonic acid-1,4-lactone	M001180	Lyxonic acid-1,4-lactone (3TMS)	A175004-101	2.99676	NA	3.74596	2.14541	NA	2.06028	NA	NA	NA	NA	NA	NA	NA	NA	NA	NA	NA	NA	NA	NA	NA	NA	43.7607	55.0482	40.8497	37.1892	32.6489	33.339	47.5177	40.4576	30.9093	38.3711	22.1987	41.4269	33.8391	33.1813	27.2595	28.4926	28.7538	32.7921	23.2046	26.0111	44.3057	37.5512
2303@2000.85	Polyhydroxy Acids	Saccharic acid	M000093	Saccharic acid (6TMS)	A201001-101	2.02293	2.07385	13.4098	29.1655	26.6538	3.76178	NA	NA	NA	NA	NA	NA	NA	NA	NA	NA	NA	NA	NA	NA	NA	NA	5.97152	8.04265	5.53733	4.36131	3.87523	5.51169	6.92811	7.34824	4.03445	6.32609	5.5777	2.93507	3.60329	2.54724	2.39454	4.46461	4.12734	5.44129	3.20703	3.31451	5.26118	4.53553
5309@1547.21	Polyhydroxy Acids	Threonic acid	M000078	Threonic acid (4TMS)	A156001-101	2.76488	1.07113	4.21182	1.96968	2.81912	1.26884	NA	NA	NA	NA	NA	NA	NA	NA	NA	NA	NA	NA	NA	NA	NA	NA	31.7636	36.2838	38.6194	24.7482	22.1383	13.5469	28.7517	21.1103	18.2678	26.327	13.2934	19.5294	18.0795	22.7739	19.9469	10.7751	17.3812	21.1537	10.0082	16.178	26.9469	18.1259
4826@1374.37	Polyhydroxy Acids	Threonic acid-1,4-lactone	M000595	Threonic acid-1,4-lactone (2TMS)	A140005-101	NA	NA	NA	NA	NA	NA	NA	NA	NA	NA	4.77665	6.98013	NA	NA	NA	NA	NA	NA	NA	NA	7.16506	6.92181	41.533	58.6119	41.5341	42.0631	44.2812	23.845	53.5644	33.4844	47.8082	40.9517	21.5015	39.0148	36.1959	39.3537	30.0162	18.9061	25.7399	27.3488	26.7363	23.7154	30.8726	24.0224
6712@1365.84	Polyols	Butane, 1,2,4-trihydroxy-	M000470	Butane, 1,2,4-trihydroxy- (3TMS)	A149005-101	NA	NA	NA	NA	NA	NA	NA	NA	NA	NA	NA	NA	NA	NA	NA	NA	NA	NA	NA	NA	NA	NA	NA	1.29984	0.996873	0.879593	1.24609	NA	1.04085	0.635262	NA	0.610829	NA	0.728108	4.37353	0.89914	0.586396	NA	NA	0.586396	0.674355	0.542416	0.737881	0.532643
648@1492.74	Polyols	Erythritol	M000054	Erythritol (4TMS)	A150002-101	19.6751	NA	NA	NA	NA	8.74098	NA	NA	NA	NA	NA	NA	NA	NA	NA	NA	0.0590205	NA	NA	NA	NA	NA	1.34168	1.81586	1.1869	1.3208	1.35772	0.794181	1.332	0.993201	1.37453	1.04587	0.50062	1.08088	1.21218	1.13745	0.689821	1.08236	1.1921	1.11216	1.19344	1.03415	1.30541	0.879874
4303@1924.94	Polyols	Galactitol	M000056	Galactitol (6TMS)	A194001-101	NA	NA	NA	NA	NA	NA	NA	NA	NA	NA	NA	NA	NA	NA	NA	NA	NA	NA	NA	NA	NA	NA	9.857	10.5157	10.5772	5.5402	6.06163	8.53259	9.33241	6.4883	4.1947	6.8959	7.1268	10.43	8.33626	6.88509	4.83833	7.43348	7.1545	6.38005	4.57955	4.73377	10.5743	7.57167
45@1260.43	Polyols	Glycerol	M000053	Glycerol (3TMS)	A129003-101	8.17916	13.2911	14.5183	16.5536	17.9649	7.01071	7.01071	8.08179	10.224	6.86465	12.8043	13.6319	13.9878	15.8715	12.234	12.7556	NA	NA	NA	NA	NA	NA	16.1025	25.9276	31.608	28.0268	16.1279	13.269	12.6411	18.4095	11.4411	NA	6.7186	11.0141	11.1977	12.7069	NA	8.03311	15.0381	9.54236	12.2201	NA	20.9538	9.25024
2511@2082.10	Polyols	Inositol, myo-	M000060	Inositol, myo- (6TMS)	A209002-101	9.23278	3.74382	9.1732	5.11465	3.04177	5.01372	NA	NA	NA	NA	NA	NA	NA	NA	NA	NA	NA	NA	NA	NA	NA	NA	63.8604	79.4719	72.5092	57.6882	58.4787	19.0134	35.7686	26.0907	16.6676	27.5525	15.8325	25.9391	30.5744	18.6388	16.848	23.3063	25.8462	24.8438	18.3988	21.0468	56.3275	41.7778
4389@1911.81	Polyols	Mannitol	M000687	Mannitol (6TMS)	A193002-101	NA	NA	NA	NA	NA	NA	NA	NA	NA	NA	NA	NA	NA	NA	NA	NA	NA	NA	NA	NA	NA	NA	5.27066	5.70563	3.88329	3.15277	4.40467	3.25921	5.61376	3.44804	3.15209	4.02432	2.0464	4.37495	4.91209	2.80175	2.59953	3.32121	4.07843	2.77697	2.68433	2.68379	4.95542	3.84251
4269@1712.30	Polyols	Ribitol	M000155	Ribitol (5TMS)	A173001-101	2.4982	0.967011	2.38606	1.40734	0.866417	1.45255	NA	NA	NA	NA	NA	NA	NA	NA	NA	NA	NA	NA	NA	NA	NA	NA	37.4327	33.7791	22.3065	25.0932	22.4865	26.1064	27.1107	18.1677	17.5368	22.1248	12.3604	24.0304	26.5598	16.9915	22.4488	21.1338	20.4574	25.3863	21.0614	19.503	27.8979	28.0973
570@1484.81	Polyols	Threitol	M000469	Threitol (4TMS)	A149002-101	0.693893	0.379655	0.872661	0.553543	0.469497	0.584218	NA	NA	NA	NA	NA	NA	NA	NA	NA	NA	NA	NA	NA	NA	NA	NA	0.97729	1.64311	1.31817	0.922921	1.03105	0.469497	0.817052	0.591825	0.748862	0.579626	NA	0.801048	0.961188	0.711798	0.417331	0.579626	0.486886	0.608607	0.563387	0.684214	1.30416	0.577155
3982@1408.95	Reagent (Contamination)	A143002-101	M000000	A143002-101	A143002-101	40.0906	21.7525	52.1114	30.1816	14.2758	40.7616	13.8477	13.0606	23.7289	26.8723	36.9255	40.5006	18.3349	23.848	6.14871	10.3708	27.3964	15.5023	19.121	16.8952	33.1933	42.6045	49.813	7.72164	45.6666	60.0568	77.1433	46.4176	11.0614	50.8204	62.9367	86.5232	35.6908	59.1719	60.45	61.5747	90.5156	49.55	50.7412	56.5367	62.8967	84.9686	21.5154	46.9353
10745@1521.68	Reagent (Contamination)	A151011-101	M000000	A151011-101	A151011-101	NA	NA	NA	NA	NA	NA	NA	NA	NA	NA	NA	NA	NA	NA	NA	NA	NA	NA	NA	NA	NA	NA	14.5333	NA	15.0667	NA	24.5333	NA	NA	15.2	NA	22	NA	NA	22.4	NA	NA	NA	19.3333	NA	NA	NA	NA	NA
1987@1931.91	Reagent (Contamination)	A194006-101	M000000	A194006-101	A194006-101	NA	NA	NA	NA	NA	NA	NA	NA	NA	NA	NA	NA	NA	NA	NA	NA	NA	NA	NA	NA	NA	NA	6.12325	8.33887	9.5347	10.6141	18.1505	4.234	8.63405	10.0818	8.94109	11.7953	2.32358	5.88774	15.1382	7.32166	4.68689	3.18097	8.14294	7.43849	6.76601	5.77633	5.16602	4.51612
247@1235.35	Reagent (Contamination)	Diethylenglycol	M000805	Diethylenglycol (2TMS)	A127003-101	67.078	30.2422	71.0201	49.436	31.8739	36.5131	77.4869	45.8536	34.3479	36.5069	57.8893	58.8082	55.6197	59.0179	36.8734	38.7436	60.2271	62.9643	65.3234	63.9913	37.158	37.161	56.0248	52.3381	62.1815	61.462	39.8276	56.2659	54.8231	58.464	65.3037	41.0375	57.338	50.6311	64.8345	62.3724	43.6124	55.2246	59.0519	61.1414	59.7447	41.9397	50.8913	52.0002
164@1129.53	Reagent (Contamination)	NA114002	M000000	NA114002 (classified unknown)	A114002-101	12.9826	17.6594	8.16935	28.3754	12.7434	5.84467	4.03037	12.1514	14.2826	21.2275	54.1143	41.9563	32.085	35.7756	25.1019	20.5194	37.2663	41.0694	38.9872	43.9527	2.44685	2.47066	45.8611	33.0781	41.6634	31.34	39.7956	18.4729	28.3828	44.4385	16.2979	28.5016	4.15814	42.0224	48.0733	16.0424	29.6207	16.3187	37.7934	57.7328	10.6504	43.3433	29.8889	32.7112
7994@1016.78	Reagent (Contamination)	Siloxane_A104001-101	M000870	Siloxane	A104001-101	19.1021	11.1976	26.8466	13.6485	8.12425	13.8349	19.4768	12.951	12.3948	12.3616	28.4417	26.7961	15.4332	13.3512	10.1378	11.1381	72.6893	91.7078	98.8516	99.3012	15.279	15.9589	21.8207	36.6481	32.8613	26.2148	9.03226	23.2348	33.145	35.366	30.4503	10.5153	27.5611	36.9437	23.7277	30.5507	9.33928	24.5929	23.8883	20.1923	32.7844	8.94307	12.8845	30.2748
10264@1683.44	Reagent (Contamination)	Siloxane_A168009-101	M000870	Siloxane	A168009-101	NA	NA	28.3654	NA	NA	57.0374	NA	NA	NA	NA	41.6627	51.4029	NA	NA	NA	NA	30.0481	41.5869	56.5228	51.7797	68.4268	72.2376	NA	43.6489	NA	NA	15.5048	NA	27.8846	NA	NA	14.6635	19.2308	31.6106	NA	NA	17.5481	NA	14.9038	NA	NA	14.3029	NA	14.4231
5000@1755.73	Reagent (Contamination)	Siloxane_A177007-101	M000870	Siloxane	A177007-101	NA	NA	NA	NA	NA	NA	NA	NA	NA	NA	NA	NA	NA	NA	NA	NA	NA	NA	NA	NA	NA	NA	NA	3.89692	NA	3.39409	3.55123	6.63105	11.8454	13.8353	10.459	11.9611	NA	5.37398	9.88371	6.34097	7.59206	7.10954	9.97543	11.0997	10.5817	12.0073	NA	NA
10260@1972.08	Reagent (Contamination)	Siloxane_A197008-101	M000870	Siloxane	A197008-101	NA	NA	17.9747	NA	NA	57.5361	NA	NA	NA	NA	NA	NA	NA	NA	NA	NA	NA	NA	NA	NA	NA	NA	12.3207	48.3008	10.211	NA	21.8565	13.3333	37.6232	18.1435	9.62025	21.9409	25.9072	40.0308	NA	10.5485	20.8439	25.5696	12.4895	NA	13.2489	13.8397	NA	29.1576
10227@2250.88	Reagent (Contamination)	Siloxane_A225011-101	M000870	Siloxane	A225011-101	NA	NA	NA	NA	NA	61.1758	NA	NA	NA	NA	NA	NA	NA	NA	NA	NA	NA	NA	NA	NA	NA	NA	NA	43.0646	NA	NA	NA	NA	36.2912	NA	NA	NA	36.1775	42.0316	NA	NA	NA	NA	NA	NA	NA	NA	NA	NA
10230@2395.24	Reagent (Contamination)	Siloxane_A240010-101	M000870	Siloxane	A240010-101	NA	NA	18.9402	NA	NA	60.7051	NA	NA	NA	NA	NA	NA	NA	NA	NA	NA	NA	NA	NA	NA	NA	NA	NA	42.841	14.6561	NA	18.602	17.0237	39.5716	17.1364	NA	23.6753	30.3269	37.82	NA	12.8523	22.9989	27.9594	NA	NA	17.4746	16.1218	NA	27.6212
10233@2533.25	Reagent (Contamination)	Siloxane_A253006-101	M000870	Siloxane	A253006-101	NA	NA	NA	NA	NA	30.0595	NA	NA	NA	NA	NA	NA	NA	NA	NA	NA	NA	32.0738	37.0478	39.077	38.8179	49.3337	NA	32.4066	NA	NA	NA	NA	28.1339	NA	NA	NA	NA	34.1376	NA	NA	NA	NA	NA	NA	NA	NA	NA	32.3383
2991@2635.68	Reagent (Contamination)	Siloxane_A266005-101	M000870	Siloxane	A266005-101	NA	NA	NA	NA	NA	NA	NA	NA	NA	NA	NA	NA	NA	NA	NA	NA	NA	NA	NA	NA	NA	NA	73.5233	80.3845	66.0962	60.1307	66.2819	61.6949	83.4829	85.8088	68.1676	65.5461	59.6178	63.8394	60.1538	60.6309	62.4603	68.5403	79.5976	74.6094	52.2388	67.5497	64.6052	65.3799
3189@2721.05	Reagent (Contamination)	Siloxane_A271010-101	M000870	Siloxane	A271010-101	NA	NA	NA	NA	NA	NA	NA	NA	NA	NA	NA	NA	NA	NA	NA	NA	NA	NA	NA	NA	NA	NA	15.8684	16.3255	19.9299	10.6911	8.19783	33.6568	60.0333	53.0908	35.979	33.6714	13.899	41.9925	29.9311	20.1502	12.9578	49.1497	38.9104	49.0068	33.6648	20.3082	NA	12.0728
10213@2772.01	Reagent (Contamination)	Siloxane_A278009-101	M000870	Siloxane	A278009-101	NA	NA	7.79848	NA	NA	36.5079	NA	NA	NA	NA	NA	NA	NA	NA	NA	NA	NA	NA	NA	NA	NA	NA	NA	25.1759	9.31677	NA	12.9745	10.8351	19.5997	12.6984	NA	10.9041	18.2195	23.7722	NA	NA	10.2139	18.3575	NA	NA	9.17874	9.24776	NA	24.05
11404@1127.32	Reagent (Contamination)	similar to Cyclopentasiloxane, decamethyl	M000870	similar to Cyclopentasiloxane, decamethyl	A113001-101	23.8976	NA	43.6884	18.0654	NA	62.6185	33.4648	20.1991	19.7724	26.3158	63.9006	55.6742	30.1565	40.1991	22.6174	25.6046	37.8605	51.4419	61.8505	63.4656	85.5893	99.1465	24.8933	60.5247	47.0012	34.7437	30.0142	24.7511	61.9687	28.5917	30.0142	36.2214	20.6259	40.1449	38.138	33.9739	32.1038	31.1388	59.6323	28.5917	29.5875	34.88	22.7596	21.1949
227@1208.03	Reagent (Contamination)	similar to Pentasiloxane, dodecamethyl	M000870	similar to Pentasiloxane, dodecamethyl	A123002-101	NA	NA	53.3042	NA	NA	54.9968	6.44731	NA	NA	NA	79.5765	86.9429	NA	5.91374	NA	NA	17.7202	25.1347	30.6012	32.4944	83.1428	100	NA	21.2603	5.9582	5.02446	12.2621	NA	15.9773	8.27882	6.35838	11.7875	6.13606	13.2955	NA	7.47018	9.84274	5.9582	35.7019	NA	6.98088	9.77324	NA	6.53624
3369@2575.13	Sugar Conjugates	4-Hydroxyphenyl-beta-glucopyranoside	M001176	4-Hydroxyphenyl-beta-glucopyranoside (5TMS)	A258002-101	NA	NA	NA	NA	NA	NA	NA	NA	NA	NA	NA	NA	NA	NA	NA	NA	NA	NA	NA	NA	NA	NA	8.37339	10.2278	7.759	5.6051	12.2358	11.1453	21.3145	16.1608	11.886	12.5312	7.29762	12.5695	13.4056	9.53773	9.31671	13.9061	12.0152	16.2234	12.23	10.9992	51.066	7.45421
3681@2966.19	Sugar Conjugates	Galactinol	M000673	Galactinol (9TMS)	A299002-101	NA	NA	NA	NA	NA	NA	NA	NA	NA	NA	NA	NA	NA	NA	NA	NA	NA	NA	NA	NA	NA	NA	15.1936	22.1632	12.2943	25.1211	6.6002	19.1605	18.7155	18.8912	15.141	37.084	8.59275	21.4561	23.8694	11.4975	23.7116	15.573	14.5558	19.3657	11.1534	18.5146	7.6414	7.26374
10387@1919.51	Sugar Conjugates	Glucose, 2-amino-2-deoxy-	M000688	Glucose, 2-amino-2-deoxy- (1MEOX) (5TMS) MP	A193007-101	14.5926	6.10137	14.6074	8.5275	5.78909	8.91184	NA	NA	NA	NA	NA	NA	NA	2.71439	NA	NA	NA	NA	NA	NA	NA	NA	5.23661	6.58179	3.57915	3.77132	4.39587	2.57026	3.36296	NA	NA	NA	NA	4.90031	5.38074	2.69037	NA	3.98751	NA	NA	3.12275	NA	12.5187	3.96349
3360@2570.35	Sugar Conjugates	Salicylic acid-glucopyranoside	M001182	Salicylic acid-glucopyranoside (5TMS)	A258003-101	NA	NA	NA	NA	NA	NA	NA	NA	NA	NA	NA	NA	NA	NA	NA	NA	NA	NA	NA	NA	NA	NA	9.64537	10.2361	9.32045	5.87609	6.64387	14.6853	26.5238	18.7653	13.59	15.2179	8.88533	14.5405	14.535	10.4703	9.05638	16.9648	14.9949	20.5811	13.2631	12.2486	15.291	7.97554
3986@1651.37	Sugars	Arabinose	M000581	Arabinose (1MEOX) (4TMS) MP	A167002-101	5.35606	4.26773	4.76313	3.05454	NA	2.19807	9.05741	4.35984	3.89929	NA	6.20203	5.15812	NA	3.68437	NA	NA	4.57476	3.86859	4.9739	4.20632	NA	NA	16.9542	26.9969	15.336	18.4226	16.098	13.2518	23.1892	15.9623	13.1086	16.5909	7.15296	17.3949	14.5295	14.3068	9.63686	10.6754	10.9524	14.1836	11.642	10.4305	13.4724	11.8918
1547@1855.16	Sugars	Fructose	M000606	Fructose (1MEOX) (5TMS) MP	A187002-101	0.973566	0.373352	0.99166	0.573794	0.328454	0.562977	NA	NA	NA	NA	NA	NA	NA	NA	NA	NA	NA	NA	NA	NA	NA	NA	10.0521	4.76617	2.43372	4.92443	2.24301	2.42208	2.34282	1.3577	1.46452	2.50436	0.443483	2.1418	1.58927	2.12949	2.58426	3.46212	3.2217	4.7119	2.87316	2.95699	3.75729	4.24647
7378@1715.52	Sugars	Fucose	M000591	Fucose (1MEOX) (4TMS) MP	A173002-101	12.6712	5.55913	13.089	8.70188	5.15458	8.3491	NA	NA	NA	NA	NA	NA	NA	NA	NA	NA	NA	NA	NA	NA	NA	NA	6.54995	8.04725	5.87969	5.87391	5.63737	4.7909	6.49438	4.76428	4.37753	8.63065	4.60989	8.1922	9.2178	5.28771	5.54405	5.87893	5.22239	6.5057	5.55657	5.68601	4.95843	4.84028
1614@1900.78	Sugars	Glucose	M000040	Glucose (1MEOX) (5TMS) BP	A191001-101	0.500211	0.217331	0.510127	0.301142	0.197876	0.315926	NA	NA	NA	NA	NA	NA	NA	NA	NA	NA	NA	NA	NA	NA	NA	NA	3.28096	1.48998	1.09964	1.85481	1.00552	0.903233	1.13576	0.853718	0.891644	1.24411	0.276458	0.924805	0.984759	0.93341	1.32796	1.35128	1.57437	1.96772	1.1954	1.38661	1.44092	1.171
8893@1700.62	Sugars	Glucose, 1,6-anhydro-, beta-	M000248	Glucose, 1,6-anhydro-, beta- (3TMS)	A172001-101	10.9678	4.85297	11.2932	6.22798	4.17869	7.10872	8.35955	NA	NA	NA	8.49438	9.03371	5.16854	6.20225	NA	NA	3.75374	4.22414	4.27171	5.42961	NA	NA	6.67192	9.73549	6.3742	8.18011	5.41469	22.2111	33.9061	25.7912	22.2736	25.299	13.9015	22.6485	14.8541	17.0963	14.651	24.5102	18.4682	21.5612	24.0539	23.0881	3.59061	6.26011
3826@3357.37	Sugars	Kestose, 1-	M000814	Kestose, 1- (11TMS)	A340003-101	1.09121	NA	NA	NA	NA	NA	NA	NA	NA	NA	NA	NA	NA	NA	NA	NA	NA	NA	NA	NA	NA	NA	7.6392	3.79689	3.33885	3.44987	NA	NA	1.84028	1.63305	1.57047	2.38361	NA	NA	NA	1.73463	NA	2.69615	2.71739	3.12197	1.78002	1.63797	1.5578	2.29035
10718@3376.98	Sugars	Kestose, 6-	M000815	Kestose, 6- (11TMS)	A341001-101	NA	NA	NA	NA	NA	NA	NA	NA	NA	NA	NA	NA	NA	NA	NA	NA	NA	NA	NA	NA	NA	NA	24.5998	NA	NA	9.39819	NA	NA	12.0363	NA	10.305	NA	NA	NA	NA	NA	NA	9.64551	9.89283	11.5416	NA	NA	NA	NA
3172@2720.93	Sugars	Maltose	M000048	Maltose (1MEOX) (8TMS) MP	A274001-101	24.3393	8.18822	27.2726	15.9651	7.73129	15.8077	NA	NA	NA	NA	NA	NA	NA	NA	NA	NA	NA	NA	NA	NA	NA	NA	12.9698	15.0963	11.5362	7.30294	10.4371	26.3117	42.8851	32.3083	19.6101	22.7302	9.26213	26.7438	23.3338	12.3519	8.69781	28.6974	23.291	34.416	20.5657	14.2674	6.63356	9.15232
6647@3428.82	Sugars	Melezitose	M999999	Melezitose (11TMS)	A346001-101	NA	NA	NA	NA	NA	NA	NA	NA	NA	NA	NA	NA	NA	NA	NA	NA	NA	NA	NA	NA	NA	NA	5.68991	6.19836	5.5472	5.60982	NA	3.35823	4.66269	5.05385	4.48931	3.61909	NA	4.61502	5.21109	3.95838	NA	4.8967	5.12114	6.75482	3.3256	2.30717	NA	NA
5555@2836.76	Sugars	Melibiose	M000171	Melibiose (1MEOX) (8TMS) MP	A287003-101	73.3302	25.167	100	57.7555	33.729	47.3399	NA	NA	NA	NA	NA	NA	NA	NA	NA	NA	NA	NA	NA	NA	NA	NA	NA	2.75523	NA	NA	NA	NA	NA	NA	NA	NA	NA	4.03444	2.95203	NA	2.98383	NA	NA	NA	NA	NA	NA	NA
10556@1838.51	Sugars	Psicose	M000629	Psicose (1MEOX) (5TMS) BP	A185007-101	NA	NA	NA	NA	NA	NA	NA	NA	NA	NA	NA	NA	NA	NA	NA	NA	NA	NA	NA	NA	NA	NA	19.8831	29.8768	21.0179	8.59966	11.2003	9.55014	24.1925	7.97586	7.08661	7.77526	4.36931	7.82168	10.2343	5.60445	5.40374	10.0913	8.98629	9.31824	7.13293	5.71252	16.5119	14.3703
3772@3350.12	Sugars	Raffinose	M000049	Raffinose (11TMS)	A337002-101	3.62395	1.16707	2.96175	1.30578	1.2091	0.857994	NA	NA	NA	NA	NA	NA	NA	NA	NA	NA	NA	NA	NA	NA	NA	NA	12.0366	8.70004	4.41058	11.6805	2.68655	11.8128	11.3862	9.80455	13.9592	21.3782	5.44852	20.2896	21.504	8.63463	12.0267	9.04173	11.8829	17.355	8.58234	8.31402	3.51047	2.20225
11530@1666.22	Sugars	Ribose	M000582	Ribose (1MEOX) (4TMS) MP	A168002-101	16.9839	NA	17.4231	NA	NA	9.80966	NA	NA	NA	NA	NA	NA	NA	NA	NA	NA	NA	NA	NA	NA	NA	NA	14.7877	20.2782	12.0791	14.3485	12.5915	9.59004	14.4217	12.8111	8.19912	12.5183	NA	11.713	12.8843	11.347	NA	8.12592	NA	10.6881	8.71157	NA	12.1523	15.0073
840@1665.05	Sugars	Ribulose	M000879	Ribulose (1MEOX) (4TMS) MP	A166012-101	28.2963	10.8639	29.1056	14.3809	9.46892	15.6808	NA	NA	NA	NA	NA	NA	NA	NA	NA	NA	NA	NA	NA	NA	NA	NA	3.04209	3.80616	2.04062	2.51583	2.60818	1.62532	2.76583	1.64173	1.49931	1.64453	1.14461	1.94535	2.05625	1.69129	1.36269	2.90945	2.77872	3.32659	3.13723	2.76482	2.8743	2.51203
96@2622.62	Sugars	Sucrose	M000044	Sucrose (8TMS)	A264001-101	NA	NA	NA	NA	NA	NA	NA	NA	NA	NA	NA	NA	NA	NA	NA	NA	NA	NA	NA	NA	NA	NA	27.8705	44.2915	45.2346	16.8867	10.2355	13.5685	35.0172	45.4592	17.1638	8.89031	2.26541	22.3394	7.53472	22.5955	2.01368	17.4356	53.1072	8.61282	35.3601	5.19252	35.7239	4.54819
3201@2725.94	Sugars	Trehalose, alpha,alpha-	M000671	Trehalose, alpha,alpha'- (8TMS)	A274002-101	88.5497	36.1864	99.9684	54.7819	29.608	60.4163	NA	NA	NA	NA	NA	NA	NA	NA	NA	NA	NA	NA	NA	NA	NA	NA	30.1066	55.3548	58.2527	37.1981	32.2606	28.8315	35.533	30.6456	16.2913	31.6867	15.4412	24.9244	29.1831	17.1488	19.6772	18.7913	19.2891	31.8992	14.4355	20.9728	49.79	24.1021
6810@1644.07	Sugars	Xylose	M000579	Xylose (1MEOX) (4TMS) MP	A165001-101	NA	NA	NA	NA	NA	NA	NA	NA	NA	NA	NA	NA	NA	NA	NA	NA	NA	NA	NA	NA	NA	NA	15.8094	24.681	16.921	19.5326	17.0941	14.5231	21.0839	15.653	11.5985	14.8222	6.87936	17.9557	18.2654	18.0234	10.3024	18.91	17.2483	19.7456	15.3794	16.9824	14.3014	12.0638
[truncated: 218 more columns]
